# Supplementary material
Source: publisher figshare collection journal article supplement (https://gsajournals.figshare.com/ndownloader/files/26610278)
Supplement: Supplementary file 1 [file 26610278]

## Sheet: Legend
Dataset S4 (separate file). GSEA Enriched KEGG Pathways (.xlsx workbook). GSEA statistics associated with pathways enriched and depleted following three pairwise comparisons: A) life stage specific comparison, B) Sequential life stage comparison, and C) intermediate life stage comparisons. Each tab (excluding the first) represents a family of similar KEGG pathways. The first tab visually summariz…

## Sheet: Summary of Pathway Enrichments
GSEA-pairwise comparisons for			,= negatively enriched (older lifestage compared to younger lifestage
Amino acid metabolism pathways			,= not significantly enriched
			,=sequential pairwise comparison
	Branch chain amino acids		1	2	3	4	YA						Amino acid metabolism		2v1	3v1	4v1	YAv1
API00280	Valine, leucine and isoleucine degradation	1	\									1st vs 2,3,4,YA	API00330	Arginine and proline metabolism
		2	\	\									API00360	Phenylalanine metabolism
		3	\	\	\								API00350	Tyrosine metabolism
		4	\	\	\	\							API00270	Cysteine and methionine metabolism
		YA	\	\	\	\	\	\-->	Energy Metabolism				API00280	Valine, leucine and isoleucine degradation
			1	2	3	4	YA						API00260	Glycine, serine and threonine metabolism
API00270	Cysteine and methionine metabolism	1	\										API00380	Tryptophan metabolism
		2	\	\									API00250	Alanine, aspartate and glutamate metabolism
		3	\	\	\								API00340	Histidine metabolism
		4	\	\	\	\
		YA	\	\	\	\	\						Vitamins and other amino acid metabolism
													API00430	Taurine and hypotaurine metabolism
			1	2	3	4	YA						API00790	Folate biosynthesis
API00260	Glycine, serine and threonine metabolism	1	\										API00770	Pantothenate and CoA biosynthesis
		2	\	\				\-->	Methyl donors				API00730	Thiamine metabolism
		3	\	\	\								API00740	Riboflavin metabolism
		4	\	\	\	\							API00410	beta-Alanine metabolism
		YA	\	\	\	\	\						API00750	Vitamin B6 metabolism
													API00670	One carbon pool by folate
			1	2	3	4	YA						API00310	Lysine degradation
API00330	Arginine and proline metabolism	1	\
		2	\	\									Amino acid metabolism		2v1	3v2	4v2	YAv2
		3	\	\	\							2nd vs 1,3,4,YA	API00330	Arginine and proline metabolism
		4	\	\	\	\							API00360	Phenylalanine metabolism
		YA	\	\	\	\	\						API00350	Tyrosine metabolism
													API00270	Cysteine and methionine metabolism
			1	2	3	4	YA						API00280	Valine, leucine and isoleucine degradation
API00360	Phenylalanine metabolism	1	\										API00260	Glycine, serine and threonine metabolism
		2	\	\									API00380	Tryptophan metabolism
		3	\	\	\								API00250	Alanine, aspartate and glutamate metabolism
		4	\	\	\	\							API00340	Histidine metabolism
		YA	\	\	\	\	\
			1	2	3	4	YA						Vitamins and other amino acid metabolism
API00350	Tyrosine metabolism	1	\					\-->	Aromatic amino acids				API00430	Taurine and hypotaurine metabolism
		2	\	\									API00790	Folate biosynthesis
		3	\	\	\								API00770	Pantothenate and CoA biosynthesis
		4	\	\	\	\							API00730	Thiamine metabolism
		YA	\	\	\	\	\						API00740	Riboflavin metabolism
			1	2	3	4	YA						API00410	beta-Alanine metabolism
API00380	Tryptophan metabolism	1	\										API00750	Vitamin B6 metabolism
		2	\	\									API00670	One carbon pool by folate
		3	\	\	\								API00310	Lysine degradation
		4	\	\	\	\
		YA	\	\	\	\	\
			1	2	3	4	YA					3rd vs 1,2,4,YA	Amino acid metabolism		3v1	3v2	4v3	YAv3
API00340	Histidine metabolism	1	\										API00330	Arginine and proline metabolism
		2	\	\									API00360	Phenylalanine metabolism
		3	\	\	\								API00350	Tyrosine metabolism
		4	\	\	\	\							API00270	Cysteine and methionine metabolism
		YA	\	\	\	\	\						API00280	Valine, leucine and isoleucine degradation
													API00260	Glycine, serine and threonine metabolism
			1	2	3	4	YA						API00380	Tryptophan metabolism
API00310	Lysine degradation	1	\										API00250	Alanine, aspartate and glutamate metabolism
		2	\	\									API00340	Histidine metabolism
		3	\	\	\
		4	\	\	\	\							Vitamins and other amino acid metabolism
		YA	\	\	\	\	\						API00430	Taurine and hypotaurine metabolism
													API00790	Folate biosynthesis
													API00770	Pantothenate and CoA biosynthesis
													API00730	Thiamine metabolism
													API00740	Riboflavin metabolism
													API00410	beta-Alanine metabolism
													API00750	Vitamin B6 metabolism
													API00670	One carbon pool by folate
													API00310	Lysine degradation
												4th vs 1,2,3,YA	Amino acid metabolism		4v1	4v2	4v3	YAv4
													API00330	Arginine and proline metabolism
													API00360	Phenylalanine metabolism
													API00350	Tyrosine metabolism
													API00270	Cysteine and methionine metabolism
													API00280	Valine, leucine and isoleucine degradation
													API00260	Glycine, serine and threonine metabolism
													API00380	Tryptophan metabolism
													API00250	Alanine, aspartate and glutamate metabolism
													API00340	Histidine metabolism
													Vitamins and other amino acid metabolism
													API00430	Taurine and hypotaurine metabolism
													API00790	Folate biosynthesis
													API00770	Pantothenate and CoA biosynthesis
													API00730	Thiamine metabolism
													API00740	Riboflavin metabolism
													API00410	beta-Alanine metabolism
													API00750	Vitamin B6 metabolism
													API00670	One carbon pool by folate
													API00310	Lysine degradation
												YA vs 1,2,3,4
													Amino acid metabolism		YAv1	YAv2	YAv3	YAv4
													API00330	Arginine and proline metabolism
													API00360	Phenylalanine metabolism
													API00350	Tyrosine metabolism
													API00270	Cysteine and methionine metabolism
													API00280	Valine, leucine and isoleucine degradation
													API00260	Glycine, serine and threonine metabolism
													API00380	Tryptophan metabolism
													API00250	Alanine, aspartate and glutamate metabolism
													API00340	Histidine metabolism
													Vitamins and other amino acid metabolism
													API00430	Taurine and hypotaurine metabolism
													API00790	Folate biosynthesis
													API00770	Pantothenate and CoA biosynthesis
													API00730	Thiamine metabolism
													API00740	Riboflavin metabolism
													API00410	beta-Alanine metabolism
													API00750	Vitamin B6 metabolism
													API00670	One carbon pool by folate
													API00310	Lysine degradation

## Sheet: Amino acids & Vitamins
A. Life Stage Specific Comparisons			Essential amino acid metabolism
	Direction of enrichment1	KEGG ID	KEGG PWY	SIZE2	ES3	NES4	p-val5	FDR q-val6
	1st vs average of other stages
	enriched	API00280	Valine, leucine and isoleucine degradation	38	0.5581	1.91615	0.00129032	0.00172701
	enriched	API00380	Tryptophan metabolism	31	0.503355	1.67645	0.00694444	0.0139828
	enriched	API00330	Arginine and proline metabolism	34	0.54595	1.83675	0.00131926	0.00387885
	enriched	API00270	Cysteine and methionine metabolism	40	0.500558	1.74912	0.002574	0.00783587
	enriched	API00350	Tyrosine metabolism	17	0.611854	1.75628	0.0074184	0.00773133
	2nd vs average of other stages
	enriched	API00280	Valine, leucine and isoleucine degradation	38	0.660509	2.5539	0	0
	enriched	API00270	Cysteine and methionine metabolism	40	0.601903	2.34091	0	0
	enriched	API00330	Arginine and proline metabolism	34	0.476613	1.79898	0.00518135	0.0101151
	enriched	API00310	Lysine degradation	50	0.4085	1.68968	0	0.0225876
	enriched	API00360	Phenylalanine metabolism	14	0.625911	1.8509	0.00253165	0.00702082
	enriched	API00380	Tryptophan metabolism	31	0.46005	1.685	0.0078329	0.0228937
	3rd vs average of other stages
	depleted	API00380	Tryptophan metabolism	31	-0.490965	-1.66674	0.00573888	0.0400119
	depleted	API00280	Valine, leucine and isoleucine degradation	38	-0.461118	-1.64863	0.00591716	0.0417069
	depleted	API00360	Phenylalanine metabolism	14	-0.71971	-2.02716	0	0.00177419
	depleted	API00350	Tyrosine metabolism	17	-0.670989	-1.99167	0	0.00207041
	4th vs average of other stages
	depleted	API00280	Valine, leucine and isoleucine degradation	38	-0.491977	-1.84024	0.00139276	0.00674107
	depleted	API00270	Cysteine and methionine metabolism	40	-0.429318	-1.60992	0.00992908	0.0357913
	depleted	API00380	Tryptophan metabolism	31	-0.409345	-1.45726	0.0485714	0.0885222
	YA vs average of other stages
	depleted	API00270	Cysteine and methionine metabolism	40	-0.647067	-2.33647	0	0
	depleted	API00280	Valine, leucine and isoleucine degradation	38	-0.682086	-2.42534	0	0
	depleted	API00330	Arginine and proline metabolism	34	-0.608478	-2.11695	0	0.000244318
	depleted	API00310	Lysine degradation	50	-0.526046	-1.97681	0	0.000630779
	depleted	API00360	Phenylalanine metabolism	14	-0.565176	-1.57382	0.0386555	0.0305494
	depleted	API00340	Histidine metabolism	9	-0.71381	-1.72232	0.00702988	0.0109144
	depleted	API00380	Tryptophan metabolism	31	-0.431754	-1.46171	0.0417335	0.0714826
	1FDR q-value £ 0.25 & p-value £ 0.05. 2Number of genes included in the gene set. 3Enrichment Score. 4Normalized Enrichment Score. 5Normalized p -value. 6False Discovery Rate q -value.
			Metabolism of other Amino acids and vitamins
	Direction of enrichment1	KEGG ID	KEGG PWY	SIZE2	ES3	NES4	p-val5	FDR q-val6
	1st vs average of other stages
	enriched	API00260	Glycine, serine and threonine metabolism	28	0.575739	1.84937	0	0.00339378
	enriched	API00250	Alanine, aspartate and glutamate metabolism	23	0.549724	1.6827	0.0136986	0.014027
	enriched	API00480	Glutathione metabolism	72	0.601386	2.32276	0	0
	enriched	API00790	Folate biosynthesis	30	0.557334	1.82764	0.00136612	0.0041915
	enriched	API00830	Retinol metabolism	56	0.626869	2.33139	0	0
	enriched	API00730	Thiamine metabolism	11	0.661748	1.68544	0.00772798	0.0140078
	enriched	API00770	Pantothenate and CoA biosynthesis	9	0.656333	1.59028	0.0234742	0.0291346
	enriched	API00760	Nicotinate and nicotinamide metabolism	18	0.529159	1.55463	0.0222552	0.0373292
	enriched	API00860	Porphyrin and chlorophyll metabolism	72	0.580936	2.26171	0	0
	2nd vs average of other stages
	enriched	API00260	Glycine, serine and threonine metabolism	28	0.705745	2.50692	0	0
	enriched	API00250	Alanine, aspartate and glutamate metabolism	23	0.578605	1.9694	0	0.00325516
	enriched	API00410	beta-Alanine metabolism	23	0.582873	1.95746	0	0.00324274
	enriched	API00480	Glutathione metabolism	72	0.370448	1.65288	0.00296736	0.0286933
	enriched	API00790	Folate biosynthesis	30	0.482856	1.73601	0.00483092	0.0160504
	enriched	API00830	Retinol metabolism	56	0.519876	2.19536	0	0
	enriched	API00730	Thiamine metabolism	11	0.662544	1.77795	0.00235294	0.0117878
	enriched	API00770	Pantothenate and CoA biosynthesis	9	0.688555	1.74757	0.00230415	0.0149148
	enriched	API00860	Porphyrin and chlorophyll metabolism	72	0.480566	2.10751	0	0.000625524
	enriched	API00670	One carbon pool by folate	12	0.703614	1.96243	0	0.0032045
	enriched	API00740	Riboflavin metabolism	12	0.611409	1.67452	0.0112867	0.0242796
	3rd vs average of other stages
	depleted	API00790	Folate biosynthesis	30	-0.462158	-1.53375	0.0253353	0.0784387
	depleted	API00480	Glutathione metabolism	72	-0.372521	-1.51287	0.00686813	0.0818999
	depleted	API00750	Vitamin B6 metabolism	4	-0.815675	-1.54021	0.0215827	0.0825558
	depleted	API00830	Retinol metabolism	56	-0.500216	-1.92204	0	0.00248463
	depleted	API00860	Porphyrin and chlorophyll metabolism	72	-0.451676	-1.80264	0.0013947	0.0114644
	4th vs average of other stages
	depleted	API00260	Glycine, serine and threonine metabolism	28	-0.635716	-2.20174	0	0.000526471
	depleted	API00250	Alanine, aspartate and glutamate metabolism	23	-0.562308	-1.88109	0.00143062	0.00533396
	depleted	API00480	Glutathione metabolism	72	-0.487103	-2.06883	0	0.000565386
	depleted	API00430	Taurine and hypotaurine metabolism	10	-0.605065	-1.59178	0.0313972	0.0397538
	depleted	API00790	Folate biosynthesis	30	-0.436349	-1.54622	0.0282087	0.0540375
	depleted	API00830	Retinol metabolism	56	-0.547048	-2.22296	0	0.000701961
	depleted	API00860	Porphyrin and chlorophyll metabolism	72	-0.459987	-1.9754	0	0.00207268
	depleted	API00730	Thiamine metabolism	11	-0.696599	-1.91153	0	0.00395688
	depleted	API00770	Pantothenate and CoA biosynthesis	9	-0.594946	-1.52674	0.0507937	0.0606177
	YA vs average of other stages
	depleted	API00260	Glycine, serine and threonine metabolism	28	-0.718549	-2.38552	0	0
	depleted	API00250	Alanine, aspartate and glutamate metabolism	23	-0.629406	-1.94337	0	0.000723901
	depleted	API00480	Glutathione metabolism	72	-0.485426	-1.97635	0	0.00059758
	depleted	API00430	Taurine and hypotaurine metabolism	10	-0.686002	-1.71709	0.00332226	0.0111596
	depleted	API00410	beta-Alanine metabolism	23	-0.629958	-1.97048	0	0.000567701
	depleted	API00790	Folate biosynthesis	30	-0.510102	-1.70581	0.00492611	0.0115181
	depleted	API00860	Porphyrin and chlorophyll metabolism	72	-0.507787	-2.04479	0	0.00036515
	depleted	API00670	One carbon pool by folate	12	-0.766103	-1.99709	0	0.000370899
	depleted	API00830	Retinol metabolism	56	-0.493167	-1.88792	0	0.00167002
	depleted	API00730	Thiamine metabolism	11	-0.670373	-1.71207	0.00837521	0.0113311
	depleted	API00740	Riboflavin metabolism	12	-0.634469	-1.64104	0.0185811	0.01851
	1FDR q-value £ 0.25 & p-value £ 0.05. 2Number of genes included in the gene set. 3Enrichment Score. 4Normalized Enrichment Score. 5Normalized p -value. 6False Discovery Rate q -value.
B. Sequential Life Stage Comparisons			Metabolism of Amino acids and vitamins
	Direction of enrichment1	KEGG ID	KEGG PWY	SIZE2	ES3	NES4	p-val5	FDR q-val6
	Enriched in 1st vs 2nd
	enriched in 1st	API00480	Glutathione metabolism	72	0.580656	1.92625	0	0.0031694
	enriched in 1st	API00830	Retinol metabolism	56	0.526941	1.69244	0.00233372	0.0432051
	enriched in 1st	API00430	Taurine and hypotaurine metabolism	10	0.711343	1.60059	0.0165663	0.0660167
	enriched in 1st	API00860	Porphyrin and chlorophyll metabolism	72	0.473158	1.59886	0.00115875	0.0616188
	enriched in 1st	API00350	Tyrosine metabolism	17	0.593486	1.5271	0.0355619	0.0924493
	enriched in 1st	API00760	Nicotinate and nicotinamide metabolism	18	0.579722	1.51094	0.0352304	0.0920181
	enriched in 1st	API00360	Phenylalanine metabolism	14	0.617355	1.49982	0.0454545	0.0971613
	enriched in 1st	API00330	Arginine and proline metabolism	34	0.505993	1.48201	0.023544	0.108254
	Enriched in 2nd vs 3rd
	enriched in 2nd	API00830	Retinol metabolism	56	0.650182	2.18269	0	0
	enriched in 2nd	API00860	Porphyrin and chlorophyll metabolism	72	0.606165	2.1454	0	0
	enriched in 2nd	API00480	Glutathione metabolism	72	0.572416	1.98616	0	0.000391616
	enriched in 2nd	API00280	Valine, leucine and isoleucine degradation	38	0.608689	1.88602	0	0.00150535
	enriched in 2nd	API00330	Arginine and proline metabolism	34	0.596607	1.80138	0	0.00368529
	enriched in 2nd	API00270	Cysteine and methionine metabolism	40	0.557028	1.77375	0	0.00451342
	enriched in 2nd	API00380	Tryptophan metabolism	31	0.568096	1.70223	0.00381679	0.0107277
	enriched in 2nd	API00790	Folate biosynthesis	30	0.543547	1.6283	0.00794702	0.0266243
	enriched in 2nd	API00430	Taurine and hypotaurine metabolism	10	0.686939	1.59182	0.017991	0.0360738
	enriched in 2nd	API00260	Glycine, serine and threonine metabolism	28	0.54367	1.58593	0.012	0.0356095
	enriched in 2nd	API00360	Phenylalanine metabolism	14	0.618749	1.58013	0.018732	0.0366384
	enriched in 2nd	API00350	Tyrosine metabolism	17	0.589911	1.54288	0.0158046	0.0479128
	enriched in 2nd	API00770	Pantothenate and CoA biosynthesis	9	0.682907	1.53314	0.0329341	0.0494881
	enriched in 2nd	API00410	beta-Alanine metabolism	23	0.526106	1.5083	0.0286885	0.0546633
	enriched in 2nd	API00730	Thiamine metabolism	11	0.630082	1.49457	0.0463378	0.0578822
	enriched in 2nd	API00750	Vitamin B6 metabolism	4	0.812913	1.45157	0.032872	0.0764569
	Enriched in 3rd vs 4th
	enriched in 3rd	API00260	Glycine, serine and threonine metabolism	28	0.641367	1.92384	0	0.00471503
	enriched in 3rd	API00730	Thiamine metabolism	11	0.732816	1.76804	0.00158228	0.0153455
	enriched in 3rd	API00250	Alanine, aspartate and glutamate metabolism	23	0.608863	1.7573	0.00294118	0.0156799
	enriched in 3rd	API00830	Retinol metabolism	56	0.50453	1.73715	0	0.0166848
	enriched in 3rd	API00860	Porphyrin and chlorophyll metabolism	72	0.467801	1.67366	0.00259403	0.0313738
	enriched in 3rd	API00480	Glutathione metabolism	72	0.439793	1.57847	0.00401606	0.0611379
	enriched in 3rd	API00280	Valine, leucine and isoleucine degradation	38	0.463537	1.46559	0.0285307	0.130043
	enriched in 3rd	API00270	Cysteine and methionine metabolism	40	0.436122	1.40446	0.0479549	0.183141
	Enriched in 4th vs YA
	enriched in 4th	API00340	Histidine metabolism	9	0.611377	1.61247	0.0396601	0.0661751
	enriched in 4th	API00270	Cysteine and methionine metabolism	40	0.374895	1.57963	0.0235849	0.0792623
	1FDR q-value £ 0.25 & p-value £ 0.05. 2Number of genes included in the gene set. 3Enrichment Score. 4Normalized Enrichment Score. 5Normalized p -value. 6False Discovery Rate q -value.
C. Intermediate Life Stage Comparisons			Metabolism of Amino acids and vitamins
	Direction of enrichment1	KEGG ID	KEGG PWY	SIZE2	ES3	NES4	p-val5	FDR q-val6
	Enriched in 1st vs 3rd
	enriched in 1st	API00830	Retinol metabolism	56	0.64	2.12	0	0
	enriched in 1st	API00860	Porphyrin and chlorophyll metabolism	72	0.6	2.04	0	0
	enriched in 1st	API00480	Glutathione metabolism	72	0.58	1.97	0	0
	enriched in 1st	API00350	Tyrosine metabolism	17	0.68	1.81	0	0.004
	enriched in 1st	API00360	Phenylalanine metabolism	14	0.69	1.78	0.003	0.005
	enriched in 1st	API00790	Folate biosynthesis	30	0.59	1.75	0	0.007
	enriched in 1st	API00280	Valine, leucine and isoleucine degradation	38	0.56	1.74	0.002	0.008
	enriched in 1st	API00330	Arginine and proline metabolism	34	0.56	1.73	0.001	0.007
	enriched in 1st	API00260	Glycine, serine and threonine metabolism	28	0.53	1.57	0.023	0.037
	enriched in 1st	API00380	Tryptophan metabolism	31	0.53	1.57	0.016	0.037
	enriched in 1st	API00770	Pantothenate and CoA biosynthesis	9	0.69	1.56	0.027	0.039
	enriched in 1st	API00760	Nicotinate and nicotinamide metabolism	18	0.56	1.49	0.042	0.064
	enriched in 1st	API00270	Cysteine and methionine metabolism	40	0.45	1.43	0.044	0.088
	Enriched in 1st vs 4th
	enriched in 1st	API00830	Retinol metabolism	56	0.64	2.18	0	0
	enriched in 1st	API00480	Glutathione metabolism	72	0.61	2.18	0	0
	enriched in 1st	API00860	Porphyrin and chlorophyll metabolism	72	0.57	2.04	0	0
	enriched in 1st	API00790	Folate biosynthesis	30	0.62	1.93	0	0.001
	enriched in 1st	API00260	Glycine, serine and threonine metabolism	28	0.62	1.87	0.001	0.001
	enriched in 1st	API00730	Thiamine metabolism	11	0.75	1.83	0	0.002
	enriched in 1st	API00270	Cysteine and methionine metabolism	40	0.53	1.74	0.002	0.006
	enriched in 1st	API00280	Valine, leucine and isoleucine degradation	38	0.54	1.72	0	0.008
	enriched in 1st	API00250	Alanine, aspartate and glutamate metabolism	23	0.57	1.65	0.007	0.018
	enriched in 1st	API00330	Arginine and proline metabolism	34	0.51	1.63	0.006	0.018
	enriched in 1st	API00350	Tyrosine metabolism	17	0.59	1.63	0.016	0.019
	enriched in 1st	API00770	Pantothenate and CoA biosynthesis	9	0.69	1.63	0.019	0.018
	enriched in 1st	API00430	Taurine and hypotaurine metabolism	10	0.68	1.61	0.012	0.021
	enriched in 1st	API00360	Phenylalanine metabolism	14	0.59	1.54	0.027	0.036
	enriched in 1st	API00760	Nicotinate and nicotinamide metabolism	18	0.54	1.52	0.031	0.041
	Enriched in 1st vs YA
	enriched in 1st	API00480	Glutathione metabolism	72	0.7	2.33	0	0
	enriched in 1st	API00830	Retinol metabolism	56	0.65	2.1	0	0
	enriched in 1st	API00860	Porphyrin and chlorophyll metabolism	72	0.62	2.05	0	0
	enriched in 1st	API00260	Glycine, serine and threonine metabolism	28	0.71	2.02	0	0
	enriched in 1st	API00270	Cysteine and methionine metabolism	40	0.65	2	0	0
	enriched in 1st	API00330	Arginine and proline metabolism	34	0.66	1.94	0	0
	enriched in 1st	API00790	Folate biosynthesis	30	0.65	1.89	0	0.001
	enriched in 1st	API00280	Valine, leucine and isoleucine degradation	38	0.62	1.86	0	0.001
	enriched in 1st	API00410	beta-Alanine metabolism	23	0.65	1.77	0.001	0.004
	enriched in 1st	API00250	Alanine, aspartate and glutamate metabolism	23	0.63	1.75	0.007	0.005
	enriched in 1st	API00730	Thiamine metabolism	11	0.75	1.71	0.003	0.007
	enriched in 1st	API00430	Taurine and hypotaurine metabolism	10	0.74	1.7	0.003	0.008
	enriched in 1st	API00760	Nicotinate and nicotinamide metabolism	18	0.6	1.57	0.027	0.026
	enriched in 1st	API00740	Riboflavin metabolism	12	0.65	1.55	0.033	0.032
	enriched in 1st	API00360	Phenylalanine metabolism	14	0.62	1.5	0.042	0.046
	enriched in 1st	API00350	Tyrosine metabolism	17	0.58	1.49	0.036	0.049
	Enriched in 2nd vs 4th
	enriched in 2nd	API00480	Glutathione metabolism	72	0.6	2.18	0	0
	enriched in 2nd	API00830	Retinol metabolism	56	0.63	2.17	0	0
	enriched in 2nd	API00260	Glycine, serine and threonine metabolism	28	0.68	2.09	0	0
	enriched in 2nd	API00860	Porphyrin and chlorophyll metabolism	72	0.57	2.08	0	0
	enriched in 2nd	API00280	Valine, leucine and isoleucine degradation	38	0.58	1.87	0.001	0.002
	enriched in 2nd	API00730	Thiamine metabolism	11	0.75	1.86	0	0.002
	enriched in 2nd	API00270	Cysteine and methionine metabolism	40	0.55	1.81	0.003	0.004
	enriched in 2nd	API00790	Folate biosynthesis	30	0.55	1.72	0.004	0.013
	enriched in 2nd	API00330	Arginine and proline metabolism	34	0.54	1.71	0.003	0.013
	enriched in 2nd	API00250	Alanine, aspartate and glutamate metabolism	23	0.58	1.7	0.004	0.014
	enriched in 2nd	API00430	Taurine and hypotaurine metabolism	10	0.64	1.53	0.026	0.057
	enriched in 2nd	API00410	beta-Alanine metabolism	23	0.51	1.52	0.029	0.06
	enriched in 2nd	API00740	Riboflavin metabolism	12	0.6	1.5	0.041	0.071
	Enriched in 2nd vs YA
	enriched in 2nd	API00260	Glycine, serine and threonine metabolism	28	0.77	2.39	0	0
	enriched in 2nd	API00860	Porphyrin and chlorophyll metabolism	72	0.61	2.27	0	0
	enriched in 2nd	API00830	Retinol metabolism	56	0.61	2.13	0	0
	enriched in 2nd	API00280	Valine, leucine and isoleucine degradation	38	0.64	2.11	0	0
	enriched in 2nd	API00480	Glutathione metabolism	72	0.58	2.08	0	0
	enriched in 2nd	API00270	Cysteine and methionine metabolism	40	0.63	2.07	0	0
	enriched in 2nd	API00410	beta-Alanine metabolism	23	0.69	2.01	0	0
	enriched in 2nd	API00330	Arginine and proline metabolism	34	0.62	1.96	0	0.001
	enriched in 2nd	API00790	Folate biosynthesis	30	0.59	1.83	0	0.004
	enriched in 2nd	API00250	Alanine, aspartate and glutamate metabolism	23	0.63	1.8	0.003	0.004
	enriched in 2nd	API00430	Taurine and hypotaurine metabolism	10	0.77	1.8	0.002	0.004
	enriched in 2nd	API00740	Riboflavin metabolism	12	0.69	1.68	0.011	0.018
	enriched in 2nd	API00670	One carbon pool by folate	12	0.68	1.65	0.018	0.023
	enriched in 2nd	API00730	Thiamine metabolism	11	0.68	1.64	0.02	0.025
	enriched in 2nd	API00310	Lysine degradation	50	0.47	1.61	0.007	0.03
	enriched in 2nd	API00360	Phenylalanine metabolism	14	0.6	1.52	0.04	0.053
	Enriched in 3rd vs YA
	enriched in 3rd	API00260	Glycine, serine and threonine metabolism	28	0.69	2.3	0	0
	enriched in 3rd	API00270	Cysteine and methionine metabolism	40	0.57	2.02	0	0.001
	enriched in 3rd	API00670	One carbon pool by folate	12	0.77	1.99	0	0.001
	enriched in 3rd	API00250	Alanine, aspartate and glutamate metabolism	23	0.63	1.98	0	0.001
	enriched in 3rd	API00410	beta-Alanine metabolism	23	0.53	1.67	0.005	0.029
	enriched in 3rd	API00280	Valine, leucine and isoleucine degradation	38	0.46	1.64	0.011	0.035
	enriched in 3rd	API00430	Taurine and hypotaurine metabolism	10	0.64	1.62	0.03	0.041
	enriched in 3rd	API00310	Lysine degradation	50	0.43	1.61	0.009	0.041
	enriched in 3rd	API00860	Porphyrin and chlorophyll metabolism	72	0.34	1.37	0.041	0.151
	1FDR q-value £ 0.25 & p-value £ 0.05. 2Number of genes included in the gene set. 3Enrichment Score. 4Normalized Enrichment Score. 5Normalized p -value. 6False Discovery Rate q -value.

## Sheet: Carbohydrate & Energy
A. Life Stage Specific Comparisons			Carbohydrate and Energy metabolism
	Direction of enrichment1	KEGG ID	KEGG PWY	SIZE2	ES3	NES4	p-val5	FDR q-val6
	1st vs average of other stages
	enriched	API00053	Ascorbate and aldarate metabolism	61	0.596913	2.24158	0	0
	enriched	API00190	Oxidative phosphorylation	113	0.54037	2.23512	0	0
	enriched	API00040	Pentose and glucuronate interconversions	73	0.564347	2.18853	0	0.000110526
	enriched	API00640	Propanoate metabolism	26	0.668398	2.11684	0	7.36842e-05
	enriched	API00630	Glyoxylate and dicarboxylate metabolism	31	0.608642	2.012	0	0.000355906
	enriched	API00020	Citrate cycle (TCA cycle)	32	0.604845	2.00023	0	0.000441921
	enriched	API00010	Glycolysis / Gluconeogenesis	44	0.531377	1.91012	0.00264901	0.001776
	enriched	API00620	Pyruvate metabolism	36	0.560123	1.89012	0	0.00239526
	enriched	API00910	Nitrogen metabolism	11	0.689032	1.80154	0	0.00492876
	enriched	API00500	Starch and sucrose metabolism	30	0.539116	1.75995	0.00554017	0.00799506
	enriched	API00030	Pentose phosphate pathway	25	0.542302	1.71473	0.00828729	0.0110478
	enriched	API00650	Butanoate metabolism	15	0.612309	1.68796	0.00742942	0.0141247
	enriched	API00520	Amino sugar and nucleotide sugar metabolism	48	0.442251	1.60977	0.00780234	0.0246809
	enriched	API00051	Fructose and mannose metabolism	24	0.491533	1.55971	0.0262069	0.0364578
	enriched	API00052	Galactose metabolism	27	0.48473	1.54172	0.034965	0.0398879
	2nd vs average of other stages
	enriched	API00190	Oxidative phosphorylation	113	0.576634	2.79839	0	0
	enriched	API00040	Pentose and glucuronate interconversions	73	0.56961	2.50947	0	0
	enriched	API00053	Ascorbate and aldarate metabolism	61	0.556381	2.37459	0	0
	enriched	API00640	Propanoate metabolism	26	0.628142	2.22822	0	0
	enriched	API00020	Citrate cycle (TCA cycle)	32	0.544649	2.00939	0	0.00175968
	enriched	API00620	Pyruvate metabolism	36	0.517233	1.96545	0.00251256	0.00317129
	enriched	API00010	Glycolysis / Gluconeogenesis	44	0.481637	1.9224	0	0.00389571
	enriched	API00500	Starch and sucrose metabolism	30	0.528732	1.9178	0	0.00401705
	enriched	API00030	Pentose phosphate pathway	25	0.52769	1.86112	0	0.00682342
	enriched	API00910	Nitrogen metabolism	11	0.680369	1.82911	0.00729927	0.00802611
	enriched	API00630	Glyoxylate and dicarboxylate metabolism	31	0.492055	1.82764	0.00486618	0.00795163
	enriched	API00650	Butanoate metabolism	15	0.575228	1.71885	0.016055	0.0176926
	3rd vs average of other stages
	depleted	API00190	Oxidative phosphorylation	113	-0.431954	-1.90585	0	0.00336012
	depleted	API00053	Ascorbate and aldarate metabolism	61	-0.482329	-1.89093	0	0.00408414
	depleted	API00040	Pentose and glucuronate interconversions	73	-0.421361	-1.7006	0.00274725	0.0321927
	depleted	API00052	Galactose metabolism	27	-0.491971	-1.63823	0.01875	0.0435661
	depleted	API00020	Citrate cycle (TCA cycle)	32	-0.472183	-1.62996	0.0133136	0.0420412
	depleted	API00620	Pyruvate metabolism	36	-0.443332	-1.56097	0.0179104	0.0732456
	depleted	API00630	Glyoxylate and dicarboxylate metabolism	31	-0.459188	-1.53537	0.0172684	0.0812249
	depleted	API00640	Propanoate metabolism	26	-0.460005	-1.50774	0.0298742	0.0822454
	4th vs average of other stages
	depleted	API00040	Pentose and glucuronate interconversions	73	-0.523986	-2.27274	0	0.00110588
	depleted	API00053	Ascorbate and aldarate metabolism	61	-0.51332	-2.12902	0	0.000512492
	depleted	API00910	Nitrogen metabolism	11	-0.738324	-1.98166	0	0.00196306
	depleted	API00030	Pentose phosphate pathway	25	-0.576479	-1.95551	0	0.00222712
	depleted	API00640	Propanoate metabolism	26	-0.552005	-1.88077	0.00147275	0.00503763
	depleted	API00630	Glyoxylate and dicarboxylate metabolism	31	-0.517079	-1.81364	0	0.00894671
	depleted	API00020	Citrate cycle (TCA cycle)	32	-0.49462	-1.80001	0	0.0100381
	depleted	API00520	Amino sugar and nucleotide sugar metabolism	48	-0.451864	-1.78178	0.0027137	0.0110431
	depleted	API00500	Starch and sucrose metabolism	30	-0.501682	-1.78178	0.0056338	0.0106014
	depleted	API00010	Glycolysis / Gluconeogenesis	44	-0.456178	-1.75642	0.00266312	0.0122927
	depleted	API00620	Pyruvate metabolism	36	-0.423376	-1.57709	0.0112202	0.0446991
	depleted	API00650	Butanoate metabolism	15	-0.5131	-1.49616	0.0419255	0.0723168
	depleted	API00190	Oxidative phosphorylation	113	-0.311981	-1.4301	0.0315917	0.101032
	YA vs average of other stages
	depleted	API00053	Ascorbate and aldarate metabolism	61	-0.573037	-2.25077	0	0
	depleted	API00620	Pyruvate metabolism	36	-0.643348	-2.20866	0	0
	depleted	API00010	Glycolysis / Gluconeogenesis	44	-0.600564	-2.20088	0	0
	depleted	API00640	Propanoate metabolism	26	-0.667446	-2.15886	0	0.00015625
	depleted	API00190	Oxidative phosphorylation	113	-0.494228	-2.13905	0	0.000138889
	depleted	API00040	Pentose and glucuronate interconversions	73	-0.526869	-2.1047	0	0.000222107
	depleted	API00650	Butanoate metabolism	15	-0.614272	-1.72356	0.00848896	0.0110008
	depleted	API00020	Citrate cycle (TCA cycle)	32	-0.501748	-1.71017	0.00162075	0.0112797
	depleted	API00630	Glyoxylate and dicarboxylate metabolism	31	-0.510363	-1.70502	0.00830565	0.0113731
	depleted	API00910	Nitrogen metabolism	11	-0.655815	-1.67933	0.0118443	0.0136793
	depleted	API00500	Starch and sucrose metabolism	30	-0.493648	-1.63851	0.00657895	0.0185075
	1FDR q-value £ 0.25 & p-value £ 0.05. 2Number of genes included in the gene set. 3Enrichment Score. 4Normalized Enrichment Score. 5Normalized p -value. 6False Discovery Rate q -value.
B. Sequential Life Stage Comparisons			Carbohydrate and Energy metabolism
	Direction of enrichment1	KEGG ID	KEGG PWY	SIZE2	ES3	NES4	p-val5	FDR q-val6
	Enriched in 1st vs 2nd
	enriched in 1st	API00630	Glyoxylate and dicarboxylate metabolism	31	0.542614	1.57195	0.017744	0.0649216
	enriched in 1st	API00053	Ascorbate and aldarate metabolism	61	0.470906	1.5394	0.0105018	0.0864773
	enriched in 1st	API00040	Pentose and glucuronate interconversions	73	0.45891	1.51978	0.0100671	0.0944213
	enriched in 1st	API00520	Amino sugar and nucleotide sugar metabolism	48	0.480928	1.51686	0.0191159	0.091512
	enriched in 1st	API00020	Citrate cycle (TCA cycle)	32	0.499413	1.47383	0.0530303	0.106928
	enriched in 1st	API00190	Oxidative phosphorylation	113	0.390521	1.35289	0.04329	0.195852
	Enriched in 2nd vs 3rd
	enriched in 2nd	API00053	Ascorbate and aldarate metabolism	61	0.653358	2.21241	0	0
	enriched in 2nd	API00040	Pentose and glucuronate interconversions	73	0.61241	2.13193	0	0
	enriched in 2nd	API00190	Oxidative phosphorylation	113	0.575103	2.08943	0	0
	enriched in 2nd	API00620	Pyruvate metabolism	36	0.593705	1.84436	0	0.00275214
	enriched in 2nd	API00630	Glyoxylate and dicarboxylate metabolism	31	0.602058	1.82091	0	0.00353964
	enriched in 2nd	API00020	Citrate cycle (TCA cycle)	32	0.59294	1.81343	0	0.00312218
	enriched in 2nd	API00640	Propanoate metabolism	26	0.60173	1.77508	0.00133869	0.00504442
	enriched in 2nd	API00500	Starch and sucrose metabolism	30	0.601736	1.77478	0.00396301	0.00476417
	enriched in 2nd	API00650	Butanoate metabolism	15	0.624958	1.64035	0.0165289	0.0240531
	enriched in 2nd	API00910	Nitrogen metabolism	11	0.670283	1.57298	0.0249633	0.0385601
	enriched in 2nd	API00030	Pentose phosphate pathway	25	0.521961	1.52481	0.0330688	0.0489224
	enriched in 2nd	API00561	Glycerolipid metabolism	45	0.463669	1.50473	0.0221948	0.0550187
	enriched in 2nd	API00010	Glycolysis / Gluconeogenesis	44	0.461154	1.49377	0.0225	0.0567107
	Enriched in 3rd vs 4th
	enriched in 3rd	API00030	Pentose phosphate pathway	25	0.65836	1.94225	0	0.00482542
	enriched in 3rd	API00040	Pentose and glucuronate interconversions	73	0.510506	1.85437	0	0.0136409
	enriched in 3rd	API00053	Ascorbate and aldarate metabolism	61	0.524717	1.84802	0	0.0116066
	enriched in 3rd	API00640	Propanoate metabolism	26	0.604917	1.80598	0	0.0144655
	enriched in 3rd	API00910	Nitrogen metabolism	11	0.692875	1.66957	0.0063593	0.0309923
	enriched in 3rd	API00500	Starch and sucrose metabolism	30	0.533403	1.60059	0.00757576	0.0505881
	1FDR q-value £ 0.25 & p-value £ 0.05. 2Number of genes included in the gene set. 3Enrichment Score. 4Normalized Enrichment Score. 5Normalized p -value. 6False Discovery Rate q -value.
C. Intermediate Life Stage Comparisons			Carbohydrate and Energy metabolism
	Direction of enrichment1	KEGG ID	KEGG PWY	SIZE2	ES3	NES4	p-val5	FDR q-val6
	Enriched in 1st vs 3rd
	enriched in 1st	API00053	Ascorbate and aldarate metabolism	61	0.62	2.06	0	0
	enriched in 1st	API00040	Pentose and glucuronate interconversions	73	0.6	2.05	0	0
	enriched in 1st	API00190	Oxidative phosphorylation	113	0.56	2.02	0	0
	enriched in 1st	API00500	Starch and sucrose metabolism	30	0.58	1.77	0.002	0.006
	enriched in 1st	API00640	Propanoate metabolism	26	0.61	1.76	0	0.006
	enriched in 1st	API00630	Glyoxylate and dicarboxylate metabolism	31	0.58	1.73	0.005	0.007
	enriched in 1st	API00020	Citrate cycle (TCA cycle)	32	0.55	1.67	0.009	0.016
	enriched in 1st	API00910	Nitrogen metabolism	11	0.7	1.67	0.011	0.016
	enriched in 1st	API00052	Galactose metabolism	27	0.56	1.63	0.01	0.023
	enriched in 1st	API00620	Pyruvate metabolism	36	0.52	1.61	0.008	0.027
	enriched in 1st	API00650	Butanoate metabolism	15	0.61	1.57	0.029	0.038
	enriched in 1st	API00010	Glycolysis / Gluconeogenesis	44	0.47	1.52	0.019	0.053
	enriched in 1st	API00030	Pentose phosphate pathway	25	0.51	1.47	0.042	0.076
	enriched in 1st	API00051	Fructose and mannose metabolism	24	0.51	1.46	0.05	0.079
	enriched in 1st	API00520	Amino sugar and nucleotide sugar metabolism	48	0.44	1.45	0.032	0.083
	Enriched in 1st vs 4th
	enriched in 1st	API00053	Ascorbate and aldarate metabolism	61	0.62	2.13	0	0
	enriched in 1st	API00040	Pentose and glucuronate interconversions	73	0.58	2.1	0	0
	enriched in 1st	API00500	Starch and sucrose metabolism	30	0.65	1.97	0	0
	enriched in 1st	API00640	Propanoate metabolism	26	0.63	1.92	0.001	0.001
	enriched in 1st	API00020	Citrate cycle (TCA cycle)	32	0.59	1.83	0	0.002
	enriched in 1st	API00030	Pentose phosphate pathway	25	0.61	1.83	0	0.002
	enriched in 1st	API00910	Nitrogen metabolism	11	0.74	1.77	0.001	0.004
	enriched in 1st	API00630	Glyoxylate and dicarboxylate metabolism	31	0.56	1.72	0.001	0.008
	enriched in 1st	API00620	Pyruvate metabolism	36	0.52	1.67	0.002	0.016
	enriched in 1st	API00650	Butanoate metabolism	15	0.62	1.64	0.008	0.018
	enriched in 1st	API00190	Oxidative phosphorylation	113	0.43	1.62	0	0.018
	enriched in 1st	API00010	Glycolysis / Gluconeogenesis	44	0.48	1.58	0.008	0.025
	enriched in 1st	API00052	Galactose metabolism	27	0.5	1.53	0.029	0.041
	enriched in 1st	API00520	Amino sugar and nucleotide sugar metabolism	48	0.46	1.52	0.014	0.043
	Enriched in 1st vs YA
	enriched in 1st	API00053	Ascorbate and aldarate metabolism	61	0.67	2.17	0	0
	enriched in 1st	API00040	Pentose and glucuronate interconversions	73	0.61	2.07	0	0
	enriched in 1st	API00640	Propanoate metabolism	26	0.72	2.02	0	0
	enriched in 1st	API00620	Pyruvate metabolism	36	0.67	2	0	0
	enriched in 1st	API00190	Oxidative phosphorylation	113	0.56	1.97	0	0
	enriched in 1st	API00500	Starch and sucrose metabolism	30	0.66	1.94	0	0
	enriched in 1st	API00010	Glycolysis / Gluconeogenesis	44	0.59	1.83	0	0.002
	enriched in 1st	API00630	Glyoxylate and dicarboxylate metabolism	31	0.62	1.79	0	0.003
	enriched in 1st	API00910	Nitrogen metabolism	11	0.74	1.73	0.004	0.006
	enriched in 1st	API00020	Citrate cycle (TCA cycle)	32	0.57	1.68	0.001	0.009
	enriched in 1st	API00650	Butanoate metabolism	15	0.65	1.65	0.013	0.013
	enriched in 1st	API00030	Pentose phosphate pathway	25	0.57	1.57	0.013	0.025
	Enriched in 2nd vs 4th
	enriched in 2nd	API00053	Ascorbate and aldarate metabolism	61	0.64	2.27	0	0
	enriched in 2nd	API00040	Pentose and glucuronate interconversions	73	0.62	2.25	0	0
	enriched in 2nd	API00640	Propanoate metabolism	26	0.67	2.02	0.001	0
	enriched in 2nd	API00500	Starch and sucrose metabolism	30	0.62	1.94	0	0
	enriched in 2nd	API00910	Nitrogen metabolism	11	0.76	1.86	0	0.002
	enriched in 2nd	API00030	Pentose phosphate pathway	25	0.61	1.81	0.001	0.005
	enriched in 2nd	API00020	Citrate cycle (TCA cycle)	32	0.55	1.7	0.005	0.014
	enriched in 2nd	API00620	Pyruvate metabolism	36	0.53	1.7	0.001	0.014
	enriched in 2nd	API00630	Glyoxylate and dicarboxylate metabolism	31	0.54	1.69	0.007	0.014
	enriched in 2nd	API00190	Oxidative phosphorylation	113	0.43	1.65	0.001	0.022
	enriched in 2nd	API00010	Glycolysis / Gluconeogenesis	44	0.49	1.62	0.011	0.028
	enriched in 2nd	API00052	Galactose metabolism	27	0.49	1.49	0.032	0.072
	Enriched in 2nd vs YA
	enriched in 2nd	API00053	Ascorbate and aldarate metabolism	61	0.67	2.4	0	0
	enriched in 2nd	API00040	Pentose and glucuronate interconversions	73	0.61	2.25	0	0
	enriched in 2nd	API00640	Propanoate metabolism	26	0.72	2.17	0	0
	enriched in 2nd	API00620	Pyruvate metabolism	36	0.66	2.11	0	0
	enriched in 2nd	API00190	Oxidative phosphorylation	113	0.53	2.09	0	0
	enriched in 2nd	API00010	Glycolysis / Gluconeogenesis	44	0.62	2.05	0	0
	enriched in 2nd	API00630	Glyoxylate and dicarboxylate metabolism	31	0.6	1.88	0	0.002
	enriched in 2nd	API00500	Starch and sucrose metabolism	30	0.59	1.82	0	0.004
	enriched in 2nd	API00910	Nitrogen metabolism	11	0.69	1.64	0.009	0.025
	enriched in 2nd	API00030	Pentose phosphate pathway	25	0.54	1.59	0.033	0.033
	enriched in 2nd	API00650	Butanoate metabolism	15	0.6	1.57	0.037	0.039
	enriched in 2nd	API00020	Citrate cycle (TCA cycle)	32	0.5	1.56	0.017	0.039
	Enriched in 3rd vs YA
	enriched in 3rd	API00640	Propanoate metabolism	26	0.59	1.91	0.003	0.002
	enriched in 3rd	API00620	Pyruvate metabolism	36	0.47	1.65	0.013	0.033
	enriched in 3rd	API00010	Glycolysis / Gluconeogenesis	44	0.43	1.58	0.017	0.05
	enriched in 3rd	API00500	Starch and sucrose metabolism	30	0.45	1.53	0.024	0.065
	enriched in 3rd	API00053	Ascorbate and aldarate metabolism	61	0.37	1.5	0.015	0.079
	enriched in 3rd	API00040	Pentose and glucuronate interconversions	73	0.36	1.48	0.009	0.081
	1FDR q-value £ 0.25 & p-value £ 0.05. 2Number of genes included in the gene set. 3Enrichment Score. 4Normalized Enrichment Score. 5Normalized p -value. 6False Discovery Rate q -value.

## Sheet: Lipid
A. Life Stage Specific Comparisons			Lipid metabolism
	Direction of enrichment1	KEGG ID	KEGG PWY	SIZE2	ES3	NES4	p-val5	FDR q-val6
	1st vs average of other stages
	enriched	API01040	Biosynthesis of unsaturated fatty acids	31	0.631957	2.12661	0	8.03828e-05
	enriched	API00062	Fatty acid elongation	23	0.573502	1.75534	0.00148148	0.0075965
	enriched	API00561	Glycerolipid metabolism	45	0.467422	1.66536	0.00391645	0.0150065
	enriched	API00061	Fatty acid biosynthesis	23	0.512222	1.56782	0.0294118	0.0348197
	enriched	API00071	Fatty acid degradation	32	0.453554	1.51594	0.0300958	0.0476308
	2nd vs average of other stages
	enriched	API00071	Fatty acid degradation	32	0.530264	1.97535	0	0.00309878
	enriched	API00061	Fatty acid biosynthesis	23	0.555343	1.85141	0.00236407	0.00729085
	enriched	API00561	Glycerolipid metabolism	45	0.460019	1.85026	0	0.006902
	enriched	API01040	Biosynthesis of unsaturated fatty acids	31	0.461338	1.72507	0.0026178	0.0172392
	enriched	API00062	Fatty acid elongation	23	0.507497	1.69809	0.0156951	0.0212304
	enriched	API00100	Steroid biosynthesis	6	0.721435	1.61311	0.0452586	0.038166
	3rd vs average of other stages
	depleted	API00071	Fatty acid degradation	32	-0.437014	-1.52026	0.0234261	0.0836379
	depleted	API00062	Fatty acid elongation	23	-0.475851	-1.51594	0.0289855	0.0829918
	depleted	API01040	Biosynthesis of unsaturated fatty acids	31	-0.440807	-1.4885	0.030722	0.0920463
	4th vs average of other stages
	depleted	API01040	Biosynthesis of unsaturated fatty acids	31	-0.546438	-1.96615	0	0.00215616
	depleted	API00062	Fatty acid elongation	23	-0.504219	-1.6686	0.0129683	0.025247
	depleted	API00561	Glycerolipid metabolism	45	-0.419949	-1.60368	0.0106101	0.036853
	YA vs average of other stages
	depleted	API00061	Fatty acid biosynthesis	23	-0.6713	-2.06691	0	0.000393239
	depleted	API00071	Fatty acid degradation	32	-0.573762	-1.95036	0	0.000792844
	depleted	API00062	Fatty acid elongation	23	-0.574964	-1.79335	0.00167224	0.00493798
	depleted	API01040	Biosynthesis of unsaturated fatty acids	31	-0.520951	-1.74919	0	0.00841669
	depleted	API00561	Glycerolipid metabolism	45	-0.447413	-1.65394	0.00332779	0.0167932
	1FDR q-value £ 0.25 & p-value £ 0.05. 2Number of genes included in the gene set. 3Enrichment Score. 4Normalized Enrichment Score. 5Normalized p -value. 6False Discovery Rate q -value.
B. Sequential Life Stage Comparisons			Lipid metabolism
	Direction of enrichment1	KEGG ID	KEGG PWY	SIZE2	ES3	NES4	p-val5	FDR q-val6
	Enriched in 1st vs 2nd
	enriched in 1st	API01040	Biosynthesis of unsaturated fatty acids	31	0.552483	1.63898	0.010596	0.0524589
	enriched in 1st	API00062	Fatty acid elongation	23	0.540842	1.47659	0.0456376	0.109152
	Enriched in 2nd vs 3rd
	enriched in 2nd	API00061	Fatty acid biosynthesis	23	0.631182	1.81578	0	0.00334519
	enriched in 2nd	API00071	Fatty acid degradation	32	0.529571	1.60718	0.015852	0.0322566
	enriched in 2nd	API00062	Fatty acid elongation	23	0.554021	1.59049	0.0163265	0.0351126
	enriched in 2nd	API01040	Biosynthesis of unsaturated fatty acids	31	0.505897	1.53505	0.0206452	0.0501119
	enriched in 2nd	API00072	Synthesis and degradation of ketone bodies	6	0.751259	1.52546	0.0339506	0.0500202
	Enriched in 3rd vs 4th
	enriched in 3rd	API00061	Fatty acid biosynthesis	23	0.532977	1.5431	0.0306569	0.0814303
	1FDR q-value £ 0.25 & p-value £ 0.05. 2Number of genes included in the gene set. 3Enrichment Score. 4Normalized Enrichment Score. 5Normalized p -value. 6False Discovery Rate q -value.
C. Intermediate Life Stage Comparisons			Lipid metabolism
	Direction of enrichment1	KEGG ID	KEGG PWY	SIZE2	ES3	NES4	p-val5	FDR q-val6
	Enriched in 1st vs 3rd
	enriched in 1st	API01040	Biosynthesis of unsaturated fatty acids	31	0.58	1.73	0.002	0.008
	enriched in 1st	API00062	Fatty acid elongation	23	0.6	1.7	0.005	0.012
	enriched in 1st	API00561	Glycerolipid metabolism	45	0.45	1.44	0.039	0.083
	Enriched in 1st vs 4th
	enriched in 1st	API01040	Biosynthesis of unsaturated fatty acids	31	0.59	1.83	0	0.002
	enriched in 1st	API00561	Glycerolipid metabolism	45	0.5	1.65	0.006	0.017
	enriched in 1st	API00061	Fatty acid biosynthesis	23	0.56	1.63	0.008	0.019
	enriched in 1st	API00062	Fatty acid elongation	23	0.56	1.6	0.014	0.021
	enriched in 1st	API00600	Sphingolipid metabolism	28	0.48	1.45	0.05	0.073
	Enriched in 1st vs YA
	enriched in 1st	API01040	Biosynthesis of unsaturated fatty acids	31	0.66	1.9	0.001	0.001
	enriched in 1st	API00061	Fatty acid biosynthesis	23	0.67	1.83	0	0.002
	enriched in 1st	API00062	Fatty acid elongation	23	0.62	1.72	0.003	0.006
	enriched in 1st	API00071	Fatty acid degradation	32	0.54	1.59	0.01	0.023
	enriched in 1st	API00561	Glycerolipid metabolism	45	0.52	1.59	0.005	0.023
	enriched in 1st	API00590	Arachidonic acid metabolism	21	0.58	1.56	0.016	0.028
	enriched in 1st	API00072	Synthesis and degradation of ketone bodies	6	0.75	1.46	0.046	0.066
	enriched in 1st	API00600	Sphingolipid metabolism	28	0.51	1.43	0.043	0.075
	Enriched in 2nd vs 4th
	enriched in 2nd	API00061	Fatty acid biosynthesis	23	0.58	1.7	0.007	0.014
	enriched in 2nd	API01040	Biosynthesis of unsaturated fatty acids	31	0.51	1.59	0.012	0.04
	enriched in 2nd	API00561	Glycerolipid metabolism	45	0.47	1.54	0.01	0.053
	enriched in 2nd	API00062	Fatty acid elongation	23	0.52	1.52	0.018	0.06
	enriched in 2nd	API00600	Sphingolipid metabolism	28	0.47	1.46	0.029	0.083
	Enriched in 2nd vs YA
	enriched in 2nd	API01040	Biosynthesis of unsaturated fatty acids	31	0.61	1.94	0	0.001
	enriched in 2nd	API00061	Fatty acid biosynthesis	23	0.66	1.9	0	0.002
	enriched in 2nd	API00071	Fatty acid degradation	32	0.59	1.89	0	0.002
	enriched in 2nd	API00062	Fatty acid elongation	23	0.61	1.78	0.002	0.006
	enriched in 2nd	API00561	Glycerolipid metabolism	45	0.48	1.6	0.008	0.033
	enriched in 2nd	API00590	Arachidonic acid metabolism	21	0.53	1.51	0.037	0.058
	Enriched in 3rd vs YA
	enriched in 3rd	API00061	Fatty acid biosynthesis	23	0.52	1.64	0.025	0.035
	enriched in 3rd	API00071	Fatty acid degradation	32	0.46	1.6	0.017	0.045
	1FDR q-value £ 0.25 & p-value £ 0.05. 2Number of genes included in the gene set. 3Enrichment Score. 4Normalized Enrichment Score. 5Normalized p -value. 6False Discovery Rate q -value.

## Sheet: Xenobiotic
A. Life Stage Specific Comparisons			Xenobiotic metabolism
	Direction of enrichment1	KEGG ID	KEGG PWY	SIZE2	ES3	NES4	p-val5	FDR q-val6
	1st vs average of other stages
	enriched	API00982	Drug metabolism - cytochrome P450	66	0.605768	2.29379	0	0
	enriched	API00980	Metabolism of xenobiotics by cytochrome P450	68	0.597685	2.27766	0	0
	enriched	API00983	Drug metabolism - other enzymes	89	0.517777	2.09359	0	6.31579e-05
	2nd vs average of other stages
	enriched	API00983	Drug metabolism - other enzymes	89	0.457595	2.14385	0	0.000181818
	enriched	API00980	Metabolism of xenobiotics by cytochrome P450	68	0.468141	2.04862	0	0.00100623
	enriched	API00982	Drug metabolism - cytochrome P450	66	0.462384	2.02283	0	0.00149601
	3rd vs average of other stages
	depleted	API00982	Drug metabolism - cytochrome P450	66	-0.516101	-2.09022	0	0.000815217
	depleted	API00980	Metabolism of xenobiotics by cytochrome P450	68	-0.488095	-1.92974	0	0.00282027
	depleted	API00983	Drug metabolism - other enzymes	89	-0.345336	-1.43775	0.0216216	0.13122
	4th vs average of other stages
	depleted	API00980	Metabolism of xenobiotics by cytochrome P450	68	-0.531801	-2.26128	0	0.000552941
	depleted	API00982	Drug metabolism - cytochrome P450	66	-0.528911	-2.18683	0	0.000421177
	depleted	API00983	Drug metabolism - other enzymes	89	-0.473452	-2.10214	0	0.000514925
	YA vs average of other stages
	depleted	API00983	Drug metabolism - other enzymes	89	-0.444596	-1.843	0	0.00253685
	depleted	API00982	Drug metabolism - cytochrome P450	66	-0.436927	-1.7257	0.0030722	0.011084
	depleted	API00980	Metabolism of xenobiotics by cytochrome P450	68	-0.426373	-1.70304	0	0.0113928
	1FDR q-value £ 0.25 & p-value £ 0.05. 2Number of genes included in the gene set. 3Enrichment Score. 4Normalized Enrichment Score. 5Normalized p -value. 6False Discovery Rate q -value.
B. Sequential Life Stage Comparisons			Xenobiotic metabolism
	Direction of enrichment1	KEGG ID	KEGG PWY	SIZE2	ES3	NES4	p-val5	FDR q-val6
	Enriched in 1st vs 2nd
	enriched in 1st	API00982	Drug metabolism - cytochrome P450	66	0.548152	1.80048	0	0.0167487
	enriched in 1st	API00980	Metabolism of xenobiotics by cytochrome P450	68	0.541479	1.77106	0	0.015428
	enriched in 1st	API00983	Drug metabolism - other enzymes	89	0.416707	1.42781	0.0219058	0.134744
	Enriched in 2nd vs 3rd
	enriched in 2nd	API00980	Metabolism of xenobiotics by cytochrome P450	68	0.631667	2.20928	0	0
	enriched in 2nd	API00982	Drug metabolism - cytochrome P450	66	0.634685	2.17675	0	0
	enriched in 2nd	API00983	Drug metabolism - other enzymes	89	0.567076	2.02345	0	0.000220355
	Enriched in 3rd vs 4th
	enriched in 3rd	API00983	Drug metabolism - other enzymes	89	0.41848	1.52731	0.00376412	0.09198
	enriched in 3rd	API00980	Metabolism of xenobiotics by cytochrome P450	68	0.42448	1.51762	0.011889	0.0962766
	enriched in 3rd	API00982	Drug metabolism - cytochrome P450	66	0.417697	1.46745	0.0145119	0.132585
	1FDR q-value £ 0.25 & p-value £ 0.05. 2Number of genes included in the gene set. 3Enrichment Score. 4Normalized Enrichment Score. 5Normalized p -value. 6False Discovery Rate q -value.
C. Intermediate Life Stage Comparisons			Xenobiotic metabolism
	Direction of enrichment1	KEGG ID	KEGG PWY	SIZE2	ES3	NES4	p-val5	FDR q-val6
	Enriched in 1st vs 3rd
	enriched in 1st	API00982	Drug metabolism - cytochrome P450	66	0.63	2.13	0	0
	enriched in 1st	API00980	Metabolism of xenobiotics by cytochrome P450	68	0.62	2.11	0	0
	enriched in 1st	API00983	Drug metabolism - other enzymes	89	0.53	1.84	0	0.003
	Enriched in 1st vs 4th
	enriched in 1st	API00980	Metabolism of xenobiotics by cytochrome P450	68	0.6	2.11	0	0
	enriched in 1st	API00982	Drug metabolism - cytochrome P450	66	0.6	2.08	0	0
	enriched in 1st	API00983	Drug metabolism - other enzymes	89	0.52	1.92	0	0.001
	Enriched in 1st vs YA
	enriched in 1st	API00982	Drug metabolism - cytochrome P450	66	0.65	2.12	0	0
	enriched in 1st	API00980	Metabolism of xenobiotics by cytochrome P450	68	0.64	2.12	0	0
	enriched in 1st	API00983	Drug metabolism - other enzymes	89	0.59	2.02	0	0
	Enriched in 2nd vs 4th
	enriched in 2nd	API00980	Metabolism of xenobiotics by cytochrome P450	68	0.59	2.14	0	0
	enriched in 2nd	API00982	Drug metabolism - cytochrome P450	66	0.59	2.11	0	0
	enriched in 2nd	API00983	Drug metabolism - other enzymes	89	0.56	2.08	0	0
	Enriched in 2nd vs YA
	enriched in 2nd	API00982	Drug metabolism - cytochrome P450	66	0.57	2.06	0	0
	enriched in 2nd	API00980	Metabolism of xenobiotics by cytochrome P450	68	0.56	2.02	0.002	0
	enriched in 2nd	API00983	Drug metabolism - other enzymes	89	0.53	1.99	0	0
	Enriched in 3rd vs 4th
	enriched in 3rd	API00983	Drug metabolism - other enzymes	89	0.41848	1.52731	0.00376412	0.09198
	enriched in 3rd	API00980	Metabolism of xenobiotics by cytochrome P450	68	0.42448	1.51762	0.011889	0.0962766
	enriched in 3rd	API00982	Drug metabolism - cytochrome P450	66	0.417697	1.46745	0.0145119	0.132585
	1FDR q-value £ 0.25 & p-value £ 0.05. 2Number of genes included in the gene set. 3Enrichment Score. 4Normalized Enrichment Score. 5Normalized p -value. 6False Discovery Rate q -value.

## Sheet: Information Processing
A. Life Stage Specific Comparisons			Information Processing
	Direction of enrichment1	KEGG ID	KEGG PWY	SIZE2	ES3	NES4	p-val5	FDR q-val6
	1st vs average of other stages
	enriched	API00230	Purine metabolism	77	0.393277	1.55098	0.00720288	0.0375895
	enriched	API04142	Lysosome	110	0.528504	2.16104	0	9.82456e-05
	enriched	API02010	ABC transporters	30	0.637075	2.09781	0	6.80162e-05
	enriched	API04145	Phagosome	59	0.466504	1.76919	0.00124533	0.00725297
	enriched	API04146	Peroxisome	81	0.377394	1.49408	0.015873	0.0547814
	depleted	API03040	Spliceosome	130	-0.586646	-3.12416	0	0
	depleted	API03030	DNA replication	42	-0.650517	-2.76482	0	0
	depleted	API03410	Base excision repair	22	-0.70394	-2.51101	0	0
	depleted	API03460	Fanconi anemia pathway	41	-0.586626	-2.50859	0	0
	depleted	API03018	RNA degradation	66	-0.526324	-2.49409	0	0
	depleted	API03440	Homologous recombination	34	-0.614517	-2.4783	0	0
	depleted	API03015	mRNA surveillance pathway	80	-0.495777	-2.44879	0	0
	depleted	API03420	Nucleotide excision repair	44	-0.57875	-2.43993	0	0
	depleted	API03430	Mismatch repair	26	-0.626839	-2.31367	0	9.77778e-05
	depleted	API03008	Ribosome biogenesis in eukaryotes	82	-0.456356	-2.28736	0	8.88889e-05
	depleted	API03050	Proteasome	45	-0.486638	-2.09226	0	0.00106366
	depleted	API03013	RNA transport	172	-0.368178	-2.03905	0	0.00107154
	depleted	API03010	Ribosome	143	-0.365833	-2.003	0	0.00156167
	depleted	API03020	RNA polymerase	37	-0.481203	-1.97803	0	0.00192524
	depleted	API04120	Ubiquitin mediated proteolysis	108	-0.351185	-1.81995	0	0.00857643
	depleted	API03450	Non-homologous end-joining	7	-0.739731	-1.79733	0.00724638	0.00968734
	depleted	API00970	Aminoacyl-tRNA biosynthesis	43	-0.371209	-1.59574	0.015625	0.0419717
	2nd vs average of other stages
	enriched	API03010	Ribosome	143	0.545117	2.71312	0	0
	enriched	API00230	Purine metabolism	77	0.424869	1.92161	0	0.00372633
	enriched	API00240	Pyrimidine metabolism	47	0.389496	1.58325	0.00257069	0.0462669
	enriched	API02010	ABC transporters	30	0.59462	2.16544	0	0
	enriched	API04145	Phagosome	59	0.352889	1.51874	0.0165746	0.0680281
	enriched	API03050	Proteasome	45	0.351049	1.40895	0.0497238	0.12947
	depleted	API04215	Apoptosis - multiple species	16	-0.597433	-1.69895	0.00507614	0.0906706
	3rd vs average of other stages
	enriched	API03040	Spliceosome	130	0.699337	3.56784	0	0
	enriched	API03010	Ribosome	143	0.589856	3.02791	0	0
	enriched	API03030	DNA replication	42	0.736689	2.98577	0	0
	enriched	API03018	RNA degradation	66	0.623088	2.80435	0	0
	enriched	API03013	RNA transport	172	0.495905	2.63623	0	0
	enriched	API03015	mRNA surveillance pathway	80	0.56023	2.59756	0	0
	enriched	API03050	Proteasome	45	0.623249	2.58412	0	0
	enriched	API03420	Nucleotide excision repair	44	0.626795	2.57446	0	0
	enriched	API03410	Base excision repair	22	0.748282	2.56883	0	0
	enriched	API03430	Mismatch repair	26	0.68978	2.48586	0	0
	enriched	API00970	Aminoacyl-tRNA biosynthesis	43	0.595383	2.45811	0	0
	enriched	API03008	Ribosome biogenesis in eukaryotes	82	0.513308	2.42176	0	0
	enriched	API03440	Homologous recombination	34	0.611617	2.33646	0	0
	enriched	API04120	Ubiquitin mediated proteolysis	108	0.477312	2.33129	0	0
	enriched	API03460	Fanconi anemia pathway	41	0.513557	2.07825	0	0.000471802
	enriched	API03020	RNA polymerase	37	0.520698	2.05051	0	0.000743408
	enriched	API04136	Autophagy - other	24	0.516448	1.83575	0.00867052	0.00644467
	enriched	API04144	Endocytosis	123	0.320269	1.61779	0	0.0346949
	enriched	API00240	Pyrimidine metabolism	47	0.367043	1.50496	0.0196721	0.0680057
	enriched	API04141	Protein processing in endoplasmic reticulum	124	0.294356	1.49762	0.00478469	0.0689058
	depleted	API04146	Peroxisome	81	-0.399007	-1.64922	0	0.0445649
	4th vs average of other stages
	enriched	API03420	Nucleotide excision repair	44	0.546562	2.45461	0	0.000414634
	enriched	API03430	Mismatch repair	26	0.607263	2.41207	0	0.000582729
	enriched	API03460	Fanconi anemia pathway	41	0.530437	2.3453	0	0.000859958
	enriched	API04130	SNARE interactions in vesicular transport	21	0.601707	2.2022	0.00280112	0.00161802
	enriched	API03050	Proteasome	45	0.482397	2.19727	0	0.00134835
	enriched	API03030	DNA replication	42	0.484091	2.18417	0	0.00128355
	enriched	API03440	Homologous recombination	34	0.5057	2.15334	0	0.00135073
	enriched	API03022	Basal transcription factors	46	0.461322	2.10072	0	0.00179951
	enriched	API03410	Base excision repair	22	0.542026	2.02851	0.00330033	0.00263748
	enriched	API03008	Ribosome biogenesis in eukaryotes	82	0.361521	1.9072	0	0.00645605
	enriched	API03018	RNA degradation	66	0.382197	1.90573	0	0.00591804
	enriched	API03015	mRNA surveillance pathway	80	0.345627	1.78717	0	0.0138347
	enriched	API00970	Aminoacyl-tRNA biosynthesis	43	0.389175	1.77119	0	0.0147647
	enriched	API03013	RNA transport	172	0.281205	1.67739	0	0.0283386
	enriched	API03450	Non-homologous end-joining	7	0.653854	1.67659	0.02267	0.026909
	enriched	API04120	Ubiquitin mediated proteolysis	108	0.284297	1.55819	0.0119048	0.058688
	enriched	API03040	Spliceosome	130	0.241024	1.36019	0.0220588	0.164202
	depleted	API00230	Purine metabolism	77	-0.452799	-1.95399	0.00127226	0.00221612
	depleted	API02010	ABC transporters	30	-0.524915	-1.84946	0.00291971	0.00679266
	depleted	API04142	Lysosome	110	-0.389111	-1.76905	0.0011919	0.0118655
	depleted	API03010	Ribosome	143	-0.328543	-1.55274	0.00235018	0.0521694
	YA vs average of other stages
	depleted	API02010	ABC transporters	30	-0.704781	-2.36031	0	0
	depleted	API03030	DNA replication	42	-0.57526	-2.08441	0	0.000307765
	depleted	API03013	RNA transport	172	-0.436569	-2.02941	0	0.000340807
	depleted	API03008	Ribosome biogenesis in eukaryotes	82	-0.492045	-2.01025	0	0.000319506
	depleted	API00240	Pyrimidine metabolism	47	-0.521802	-1.94618	0	0.000756805
	depleted	API03010	Ribosome	143	-0.432358	-1.91185	0	0.00121244
	depleted	API00230	Purine metabolism	77	-0.461812	-1.88878	0	0.00168082
	depleted	API04142	Lysosome	110	-0.43773	-1.88749	0	0.00160817
	depleted	API03050	Proteasome	45	-0.498065	-1.83215	0	0.00317511
	depleted	API00970	Aminoacyl-tRNA biosynthesis	43	-0.504633	-1.81218	0	0.00407731
	depleted	API03420	Nucleotide excision repair	44	-0.465079	-1.7089	0.00331675	0.0111412
	depleted	API03040	Spliceosome	130	-0.379202	-1.69443	0	0.0118785
	depleted	API04145	Phagosome	59	-0.431656	-1.66594	0.00319489	0.0151778
	depleted	API03430	Mismatch repair	26	-0.520776	-1.65166	0.0117253	0.0166864
	depleted	API03018	RNA degradation	66	-0.41012	-1.6229	0.00612557	0.0209399
	depleted	API04141	Protein processing in endoplasmic reticulum	124	-0.350785	-1.5418	0.00572246	0.040525
	depleted	API03410	Base excision repair	22	-0.48008	-1.49154	0.0420712	0.0587064
	depleted	API03015	mRNA surveillance pathway	80	-0.346655	-1.41781	0.0267459	0.0891801
	depleted	API04120	Ubiquitin mediated proteolysis	108	-0.322308	-1.39066	0.0229709	0.10188
	1FDR q-value £ 0.25 & p-value £ 0.05. 2Number of genes included in the gene set. 3Enrichment Score. 4Normalized Enrichment Score. 5Normalized p -value. 6False Discovery Rate q -value.
B. Sequential Life Stage Comparisons			Information Processing
	Direction of enrichment1	KEGG ID	KEGG PWY	SIZE2	ES3	NES4	p-val5	FDR q-val6
	Enriched in 1st vs 2nd
	enriched in 1st	API02010	ABC transporters	30	0.609083	1.79392	0.00128535	0.0131429
	enriched in 1st	API04142	Lysosome	110	0.467677	1.6498	0	0.058615
	depleted in 1st	API03040	Spliceosome	130	-0.646454	-3.1683	0	0
	depleted in 1st	API03010	Ribosome	143	-0.587048	-2.86095	0	0
	depleted in 1st	API03030	DNA replication	42	-0.732093	-2.85871	0	0
	depleted in 1st	API03430	Mismatch repair	26	-0.724165	-2.51743	0	0
	depleted in 1st	API03018	RNA degradation	66	-0.589489	-2.51405	0	0
	depleted in 1st	API03008	Ribosome biogenesis in eukaryotes	82	-0.539809	-2.44043	0	0
	depleted in 1st	API03440	Homologous recombination	34	-0.641379	-2.42582	0	0
	depleted in 1st	API03420	Nucleotide excision repair	44	-0.608483	-2.33479	0	0.000181481
	depleted in 1st	API03410	Base excision repair	22	-0.689507	-2.30172	0	0.000163333
	depleted in 1st	API03013	RNA transport	172	-0.463865	-2.2914	0	0.000148485
	depleted in 1st	API03020	RNA polymerase	37	-0.554379	-2.10814	0	0.000601558
	depleted in 1st	API03050	Proteasome	45	-0.533482	-2.10289	0	0.000555284
	depleted in 1st	API03460	Fanconi anemia pathway	41	-0.545036	-2.09009	0	0.000515621
	depleted in 1st	API03015	mRNA surveillance pathway	80	-0.459629	-2.05718	0	0.000939571
	depleted in 1st	API03450	Non-homologous end-joining	7	-0.784204	-1.80366	0.00290698	0.0136995
	depleted in 1st	API00970	Aminoacyl-tRNA biosynthesis	43	-0.41172	-1.6142	0.00581395	0.049322
	depleted in 1st	API04120	Ubiquitin mediated proteolysis	108	-0.33654	-1.60591	0	0.0496037
	Enriched in 2nd vs 3rd
	enriched in 2nd	API02010	ABC transporters	30	0.626392	1.89143	0	0.00148331
	enriched in 2nd	API04146	Peroxisome	81	0.415256	1.46519	0.0243337	0.0694223
	enriched in 2nd	API04142	Lysosome	110	0.389094	1.43763	0.0191011	0.0812868
	depleted in 2nd	API03040	Spliceosome	130	-0.552304	-2.67124	0	0
	depleted in 2nd	API03018	RNA degradation	66	-0.515212	-2.25265	0	0.000462366
	depleted in 2nd	API03410	Base excision repair	22	-0.660309	-2.21885	0	0.000717464
	depleted in 2nd	API03460	Fanconi anemia pathway	41	-0.549386	-2.15105	0	0.00143096
	depleted in 2nd	API03030	DNA replication	42	-0.546058	-2.14673	0	0.00119247
	depleted in 2nd	API03430	Mismatch repair	26	-0.567291	-1.98092	0	0.00487824
	depleted in 2nd	API03015	mRNA surveillance pathway	80	-0.43976	-1.95623	0	0.00543332
	depleted in 2nd	API04215	Apoptosis - multiple species	16	-0.639496	-1.89284	0	0.00958849
	depleted in 2nd	API03440	Homologous recombination	34	-0.50148	-1.88435	0	0.00907608
	depleted in 2nd	API03420	Nucleotide excision repair	44	-0.479651	-1.8519	0	0.0109969
	depleted in 2nd	API03050	Proteasome	45	-0.431544	-1.74338	0	0.0240333
	depleted in 2nd	API00970	Aminoacyl-tRNA biosynthesis	43	-0.420676	-1.6694	0	0.037065
	depleted in 2nd	API04120	Ubiquitin mediated proteolysis	108	-0.354665	-1.64402	0	0.0421725
	depleted in 2nd	API03010	Ribosome	143	-0.285347	-1.41351	0	0.124219
	depleted in 2nd	API03013	RNA transport	172	-0.283359	-1.40864	0	0.122555
	Enriched in 3rd vs 4th
	enriched in 3rd	API03010	Ribosome	143	0.461331	1.80377	0	0.0129944
	enriched in 3rd	API03040	Spliceosome	130	0.450183	1.77168	0	0.0159818
	enriched in 3rd	API02010	ABC transporters	30	0.571243	1.7504	0.00434153	0.0162198
	enriched in 3rd	API03020	RNA polymerase	37	0.523745	1.66774	0.00566572	0.0300907
	enriched in 3rd	API00230	Purine metabolism	77	0.442599	1.61715	0.00527009	0.0443576
	enriched in 3rd	API04145	Phagosome	59	0.396493	1.37825	0.0504202	0.201839
	enriched in 3rd	API04142	Lysosome	110	0.356021	1.34925	0.0457921	0.223088
	depleted in 3rd	API04130	SNARE interactions in vesicular transport	21	-0.666242	-2.1291	0	0.0019338
	Enriched in 4th vs YA
	enriched in 4th	API03030	DNA replication	42	0.695456	2.93973	0	0
	enriched in 4th	API03008	Ribosome biogenesis in eukaryotes	82	0.596336	2.89111	0	0
	enriched in 4th	API03420	Nucleotide excision repair	44	0.651667	2.78529	0	0
	enriched in 4th	API03050	Proteasome	45	0.602171	2.68053	0	0
	enriched in 4th	API03410	Base excision repair	22	0.744051	2.63465	0	0
	enriched in 4th	API03013	RNA transport	172	0.464386	2.61628	0	0
	enriched in 4th	API00970	Aminoacyl-tRNA biosynthesis	43	0.614883	2.57266	0	0
	enriched in 4th	API03430	Mismatch repair	26	0.655013	2.46687	0	0
	enriched in 4th	API03018	RNA degradation	66	0.504067	2.43425	0	0
	enriched in 4th	API03460	Fanconi anemia pathway	41	0.552754	2.39174	0	0
	enriched in 4th	API03440	Homologous recombination	34	0.589063	2.38538	0	0
	enriched in 4th	API03022	Basal transcription factors	46	0.530698	2.29756	0	0
	enriched in 4th	API04120	Ubiquitin mediated proteolysis	108	0.419334	2.20798	0	0.000151365
	enriched in 4th	API03015	mRNA surveillance pathway	80	0.440538	2.09152	0	0.00112117
	enriched in 4th	API03040	Spliceosome	130	0.370153	1.94352	0	0.00516489
	enriched in 4th	API03450	Non-homologous end-joining	7	0.780726	1.86837	0.00550964	0.00891372
	enriched in 4th	API03060	Protein export	25	0.475668	1.77076	0	0.0215644
	enriched in 4th	API03020	RNA polymerase	37	0.359376	1.50973	0.019802	0.114316
	1FDR q-value £ 0.25 & p-value £ 0.05. 2Number of genes included in the gene set. 3Enrichment Score. 4Normalized Enrichment Score. 5Normalized p -value. 6False Discovery Rate q -value.
C. Intermediate Life Stage Comparisons			Information Processing
	Direction of enrichment1	KEGG ID	KEGG PWY	SIZE2	ES3	NES4	p-val5	FDR q-val6
	Enriched in 1st vs 3rd
	enriched in 1st	API02010	ABC transporters	30	0.61	1.82	0	0.003
	enriched in 1st	API04142	Lysosome	110	0.5	1.78	0	0.006
	enriched in 1st	API04146	Peroxisome	81	0.42	1.47	0.017	0.076
	enriched in 1st	API04145	Phagosome	59	0.42	1.41	0.04	0.1
	depleted in 1st	API03040	Spliceosome	130	-0.68	-3.58	0	0
	depleted in 1st	API03030	DNA replication	42	-0.7	-2.94	0	0
	depleted in 1st	API03430	Mismatch repair	26	-0.7	-2.7	0	0
	depleted in 1st	API03410	Base excision repair	22	-0.75	-2.69	0	0
	depleted in 1st	API03018	RNA degradation	66	-0.59	-2.67	0	0
	depleted in 1st	API03420	Nucleotide excision repair	44	-0.64	-2.63	0	0
	depleted in 1st	API03010	Ribosome	143	-0.5	-2.59	0	0
	depleted in 1st	API03460	Fanconi anemia pathway	41	-0.59	-2.47	0	0
	depleted in 1st	API03015	mRNA surveillance pathway	80	-0.51	-2.41	0	0
	depleted in 1st	API03440	Homologous recombination	34	-0.61	-2.37	0	0
	depleted in 1st	API03008	Ribosome biogenesis in eukaryotes	82	-0.47	-2.26	0	0
	depleted in 1st	API03050	Proteasome	45	-0.53	-2.26	0	0
	depleted in 1st	API03013	RNA transport	172	-0.4	-2.11	0	0.001
	depleted in 1st	API04120	Ubiquitin mediated proteolysis	108	-0.4	-1.99	0	0.002
	depleted in 1st	API03020	RNA polymerase	37	-0.48	-1.93	0	0.003
	depleted in 1st	API00970	Aminoacyl-tRNA biosynthesis	43	-0.44	-1.84	0	0.006
	depleted in 1st	API03022	Basal transcription factors	46	-0.32	-1.37	0.043	0.131
	Enriched in 1st vs 4th
	enriched in 1st	API04142	Lysosome	110	0.53	1.98	0	0.001
	enriched in 1st	API02010	ABC transporters	30	0.63	1.94	0.001	0.001
	enriched in 1st	API00230	Purine metabolism	77	0.43	1.55	0.005	0.033
	enriched in 1st	API04146	Peroxisome	81	0.38	1.38	0.042	0.117
	enriched in 1st	API04145	Phagosome	59	0.4	1.38	0.049	0.117
	enriched in 1st	API04140	Autophagy - animal	108	0.36	1.34	0.042	0.142
	depleted in 1st	API03030	DNA replication	42	-0.6	-2.66	0	0
	depleted in 1st	API03430	Mismatch repair	26	-0.65	-2.46	0	0
	depleted in 1st	API03420	Nucleotide excision repair	44	-0.56	-2.44	0	0
	depleted in 1st	API03440	Homologous recombination	34	-0.57	-2.36	0	0
	depleted in 1st	API03460	Fanconi anemia pathway	41	-0.58	-2.36	0	0
	depleted in 1st	API03040	Spliceosome	130	-0.44	-2.3	0	0
	depleted in 1st	API03410	Base excision repair	22	-0.63	-2.18	0	0.001
	depleted in 1st	API03018	RNA degradation	66	-0.43	-2.03	0	0.002
	depleted in 1st	API03008	Ribosome biogenesis in eukaryotes	82	-0.41	-1.95	0	0.003
	depleted in 1st	API03015	mRNA surveillance pathway	80	-0.4	-1.94	0	0.003
	depleted in 1st	API03450	Non-homologous end-joining	7	-0.75	-1.88	0	0.006
	depleted in 1st	API03050	Proteasome	45	-0.4	-1.73	0	0.024
	depleted in 1st	API03013	RNA transport	172	-0.31	-1.7	0	0.028
	depleted in 1st	API04130	SNARE interactions in vesicular transport	21	-0.45	-1.59	0.023	0.062
	depleted in 1st	API04120	Ubiquitin mediated proteolysis	108	-0.3	-1.54	0	0.08
	depleted in 1st	API03022	Basal transcription factors	46	-0.34	-1.5	0.013	0.096
	depleted in 1st	API03020	RNA polymerase	37	-0.34	-1.43	0.043	0.133
	Enriched in 1st vs YA
	enriched in 1st	API02010	ABC transporters	30	0.74	2.12	0	0
	enriched in 1st	API04142	Lysosome	110	0.57	1.98	0	0
	enriched in 1st	API04145	Phagosome	59	0.54	1.74	0	0.005
	enriched in 1st	API00230	Purine metabolism	77	0.5	1.67	0	0.011
	enriched in 1st	API00240	Pyrimidine metabolism	47	0.5	1.59	0.007	0.023
	enriched in 1st	API04140	Autophagy - animal	108	0.42	1.45	0.014	0.07
	depleted in 1st	API03040	Spliceosome	130	-0.4	-1.93	0	0.013
	depleted in 1st	API03460	Fanconi anemia pathway	41	-0.49	-1.84	0.011	0.02
	depleted in 1st	API04130	SNARE interactions in vesicular transport	21	-0.46	-1.49	0.03	0.225
	Enriched in 2nd vs 4th
	enriched in 2nd	API02010	ABC transporters	30	0.63	1.96	0.001	0
	enriched in 2nd	API00230	Purine metabolism	77	0.47	1.75	0	0.01
	enriched in 2nd	API04142	Lysosome	110	0.41	1.57	0.002	0.044
	enriched in 2nd	API03010	Ribosome	143	0.37	1.45	0.008	0.089
	enriched in 2nd	API04146	Peroxisome	81	0.37	1.37	0.047	0.136
	depleted in 2nd	API03460	Fanconi anemia pathway	41	-0.48	-1.92	0	0.024
	depleted in 2nd	API04130	SNARE interactions in vesicular transport	21	-0.56	-1.88	0.007	0.022
	depleted in 2nd	API03420	Nucleotide excision repair	44	-0.42	-1.75	0	0.052
	depleted in 2nd	API03430	Mismatch repair	26	-0.46	-1.62	0.025	0.116
	depleted in 2nd	API03440	Homologous recombination	34	-0.41	-1.58	0.008	0.108
	depleted in 2nd	API04215	Apoptosis - multiple species	16	-0.47	-1.47	0.049	0.166
	Enriched in 2nd vs YA
	enriched in 2nd	API02010	ABC transporters	30	0.73	2.27	0	0
	enriched in 2nd	API03010	Ribosome	143	0.48	1.95	0	0.001
	enriched in 2nd	API00240	Pyrimidine metabolism	47	0.54	1.81	0	0.004
	enriched in 2nd	API03013	RNA transport	172	0.4	1.68	0	0.018
	enriched in 2nd	API03050	Proteasome	45	0.49	1.66	0.003	0.02
	enriched in 2nd	API04145	Phagosome	59	0.46	1.65	0.008	0.023
	enriched in 2nd	API04142	Lysosome	110	0.42	1.63	0.001	0.027
	enriched in 2nd	API00230	Purine metabolism	77	0.44	1.62	0.002	0.029
	enriched in 2nd	API03030	DNA replication	42	0.48	1.59	0.015	0.033
	enriched in 2nd	API03008	Ribosome biogenesis in eukaryotes	82	0.41	1.54	0.006	0.046
	Enriched in 3rd vs YA
	enriched in 3rd	API03040	Spliceosome	130	0.59	2.66	0	0
	enriched in 3rd	API03030	DNA replication	42	0.71	2.6	0	0
	enriched in 3rd	API03013	RNA transport	172	0.53	2.52	0	0
	enriched in 3rd	API03010	Ribosome	143	0.53	2.44	0	0
	enriched in 3rd	API03018	RNA degradation	66	0.56	2.27	0	0
	enriched in 3rd	API03008	Ribosome biogenesis in eukaryotes	82	0.55	2.26	0	0
	enriched in 3rd	API03410	Base excision repair	22	0.72	2.24	0	0
	enriched in 3rd	API03420	Nucleotide excision repair	44	0.59	2.18	0	0
	enriched in 3rd	API00970	Aminoacyl-tRNA biosynthesis	43	0.59	2.15	0	0
	enriched in 3rd	API03050	Proteasome	45	0.58	2.14	0	0
	enriched in 3rd	API03430	Mismatch repair	26	0.64	2.11	0	0
	enriched in 3rd	API04120	Ubiquitin mediated proteolysis	108	0.46	2.02	0	0.001
	enriched in 3rd	API03015	mRNA surveillance pathway	80	0.48	1.99	0	0.001
	enriched in 3rd	API02010	ABC transporters	30	0.59	1.99	0	0.001
	enriched in 3rd	API03440	Homologous recombination	34	0.56	1.98	0	0.001
	enriched in 3rd	API03020	RNA polymerase	37	0.49	1.74	0.003	0.017
	enriched in 3rd	API00240	Pyrimidine metabolism	47	0.46	1.67	0.006	0.028
	enriched in 3rd	API04141	Protein processing in endoplasmic reticulum	124	0.34	1.54	0	0.063
	enriched in 3rd	API03460	Fanconi anemia pathway	41	0.41	1.5	0.03	0.077
	enriched in 3rd	API00230	Purine metabolism	77	0.32	1.34	0.048	0.178
	enriched in 3rd	API04142	Lysosome	110	0.31	1.34	0.04	0.178
	1FDR q-value £ 0.25 & p-value £ 0.05. 2Number of genes included in the gene set. 3Enrichment Score. 4Normalized Enrichment Score. 5Normalized p -value. 6False Discovery Rate q -value.

## Sheet: Signaling
A. Life Stage Specific Comparisons			Signaling
	Direction of enrichment1	KEGG ID	KEGG PWY	SIZE2	ES3	NES4	p-val5	FDR q-val6
	1st vs average of other stages
	enriched	API04080	Neuroactive ligand-receptor interaction	41	0.603586	2.13226	0	8.84211e-05
	enriched	API04624	Toll and Imd signaling pathway	49	0.504144	1.82321	0.0013089	0.00402915
	enriched	API04512	ECM-receptor interaction	22	0.577623	1.75796	0.0042735	0.00775426
	enriched	API04745	Phototransduction	21	0.494683	1.505	0.0479549	0.0511728
	depleted	API04341	Hedgehog signaling pathway - fly	33	-0.575441	-2.33407	0	0
	depleted	API04310	Wnt signaling pathway	72	-0.442245	-2.10729	0	0.0011523
	depleted	API04350	TGF-beta signaling pathway	47	-0.435263	-1.92975	0	0.00310698
	depleted	API04392	Hippo signaling pathway - multiple species	17	-0.540443	-1.77475	0.00917431	0.0110887
	depleted	API04068	FoxO signaling pathway	58	-0.328825	-1.52281	0.0187793	0.0645433
	3rd vs average of other stages
	enriched	API04341	Hedgehog signaling pathway - fly	33	0.674633	2.58506	0	0
	enriched	API04350	TGF-beta signaling pathway	47	0.612818	2.55147	0	0
	enriched	API04310	Wnt signaling pathway	72	0.529176	2.39913	0	0
	enriched	API04320	Dorso-ventral axis formation	35	0.589657	2.24758	0	0
	enriched	API04391	Hippo signaling pathway	56	0.488036	2.12923	0	0.000267246
	enriched	API04068	FoxO signaling pathway	58	0.481444	2.10838	0	0.000310266
	enriched	API04013	MAPK signaling pathway	84	0.426515	2.01848	0	0.00100886
	enriched	API04330	Notch signaling pathway	33	0.518119	1.96675	0	0.00195159
	enriched	API04392	Hippo signaling pathway - multiple species	17	0.53668	1.68421	0.0129199	0.0214052
	enriched	API04150	mTOR signaling pathway	85	0.333399	1.56307	0.013245	0.0502348
	depleted	API04080	Neuroactive ligand-receptor interaction	41	-0.551999	-1.98586	0	0.00155281
	depleted	API04624	Toll and Imd signaling pathway	49	-0.452339	-1.68677	0.00439239	0.0337947
	depleted	API04745	Phototransduction	21	-0.533111	-1.63129	0.0212072	0.04398
	4th vs average of other stages
	depleted	API04512	ECM-receptor interaction	22	-0.636593	-2.11979	0	0.000439279
	depleted	API04080	Neuroactive ligand-receptor interaction	41	-0.481801	-1.84941	0.00136612	0.00645303
	depleted	API04013	MAPK signaling pathway	84	-0.391471	-1.6953	0.00246609	0.020091
	depleted	API04745	Phototransduction	21	-0.50638	-1.6557	0.00446429	0.0271471
	depleted	API04391	Hippo signaling pathway	56	-0.393424	-1.6118	0.0130378	0.0362018
	depleted	API04320	Dorso-ventral axis formation	35	-0.414499	-1.54002	0.0310296	0.0554209
	depleted	API04624	Toll and Imd signaling pathway	49	-0.370128	-1.48862	0.0329218	0.0742552
	YA vs average of other stages
	depleted	API04320	Dorso-ventral axis formation	35	-0.464018	-1.62552	0.0154639	0.0207359
	depleted	API04512	ECM-receptor interaction	22	-0.508789	-1.5379	0.0372168	0.0410469
	1FDR q-value £ 0.25 & p-value £ 0.05. 2Number of genes included in the gene set. 3Enrichment Score. 4Normalized Enrichment Score. 5Normalized p -value. 6False Discovery Rate q -value.
B. Sequential Life Stage Comparisons			Signaling
	Direction of enrichment1	KEGG ID	KEGG PWY	SIZE2	ES3	NES4	p-val5	FDR q-val6
	Enriched in 1st vs 2nd
	enriched in 1st	API04080	Neuroactive ligand-receptor interaction	41	0.663424	2.05805	0	0.00159661
	enriched in 1st	API04624	Toll and Imd signaling pathway	49	0.510797	1.60756	0.0097561	0.0669112
	enriched in 1st	API04745	Phototransduction	21	0.590367	1.58341	0.0289655	0.0624134
	depleted in 1st	API04341	Hedgehog signaling pathway - fly	33	-0.66007	-2.43179	0	0
	depleted in 1st	API04392	Hippo signaling pathway - multiple species	17	-0.573192	-1.79094	0.00696864	0.013612
	depleted in 1st	API04350	TGF-beta signaling pathway	47	-0.44182	-1.77285	0	0.0159144
	depleted in 1st	API04310	Wnt signaling pathway	72	-0.376709	-1.62969	0	0.0459946
	depleted in 1st	API04320	Dorso-ventral axis formation	35	-0.380169	-1.4292	0.0471204	0.142189
	depleted in 1st	API04391	Hippo signaling pathway	56	-0.346692	-1.42911	0.0196078	0.136007
	depleted in 1st	API04150	mTOR signaling pathway	85	-0.290327	-1.35495	0.00869565	0.189385
	Enriched in 2nd vs 3rd
	enriched in 2nd	API04624	Toll and Imd signaling pathway	49	0.470781	1.544	0.0121359	0.0489829
	enriched in 2nd	API04745	Phototransduction	21	0.549917	1.52747	0.0252454	0.0506727
	depleted in 2nd	API04310	Wnt signaling pathway	72	-0.565115	-2.47524	0	0
	depleted in 2nd	API04341	Hedgehog signaling pathway - fly	33	-0.569174	-2.12294	0	0.00102211
	depleted in 2nd	API04350	TGF-beta signaling pathway	47	-0.457732	-1.82777	0	0.0131416
	depleted in 2nd	API04330	Notch signaling pathway	33	-0.41091	-1.54477	0.0125523	0.0724219
	depleted in 2nd	API04013	MAPK signaling pathway	84	-0.325889	-1.49359	0.00775194	0.0950017
	depleted in 2nd	API04068	FoxO signaling pathway	58	-0.345927	-1.44775	0	0.112984
	Enriched in 3rd vs 4th
	enriched in 3rd	API04391	Hippo signaling pathway	56	0.533265	1.84002	0	0.0108418
	enriched in 3rd	API04320	Dorso-ventral axis formation	35	0.576566	1.81257	0	0.0148276
	enriched in 3rd	API04013	MAPK signaling pathway	84	0.469441	1.72324	0.00127551	0.0189501
	enriched in 3rd	API04512	ECM-receptor interaction	22	0.571016	1.63832	0.00789889	0.0369141
	Enriched in 4th vs YA
	depleted in 4th	API04080	Neuroactive ligand-receptor interaction	41	-0.678784	-2.28413	0	0
	depleted in 4th	API04745	Phototransduction	21	-0.624212	-1.8085	0.0042796	0.0449657
	depleted in 4th	API04512	ECM-receptor interaction	22	-0.592206	-1.72768	0.00539811	0.080712
	depleted in 4th	API04624	Toll and Imd signaling pathway	49	-0.484488	-1.64867	0.0110294	0.142618
	1FDR q-value £ 0.25 & p-value £ 0.05. 2Number of genes included in the gene set. 3Enrichment Score. 4Normalized Enrichment Score. 5Normalized p -value. 6False Discovery Rate q -value.
C. Intermediate Life Stage Comparisons			Signaling
	Direction of enrichment1	KEGG ID	KEGG PWY	SIZE2	ES3	NES4	p-val5	FDR q-val6
	Enriched in 1st vs 3rd
	enriched in 1st	API04080	Neuroactive ligand-receptor interaction	41	0.63	1.97	0	0
	enriched in 1st	API04624	Toll and Imd signaling pathway	49	0.55	1.77	0	0.006
	enriched in 1st	API04745	Phototransduction	21	0.6	1.66	0.007	0.016
	enriched in 1st	API04512	ECM-receptor interaction	22	0.55	1.51	0.048	0.058
	depleted in 1st	API04341	Hedgehog signaling pathway - fly	33	-0.66	-2.59	0	0
	depleted in 1st	API04310	Wnt signaling pathway	72	-0.51	-2.35	0	0
	depleted in 1st	API04350	TGF-beta signaling pathway	47	-0.5	-2.17	0	0
	depleted in 1st	API04392	Hippo signaling pathway - multiple species	17	-0.57	-1.91	0	0.004
	depleted in 1st	API04068	FoxO signaling pathway	58	-0.37	-1.65	0	0.03
	depleted in 1st	API04391	Hippo signaling pathway	56	-0.36	-1.63	0.008	0.033
	depleted in 1st	API04330	Notch signaling pathway	33	-0.41	-1.62	0.017	0.035
	depleted in 1st	API04320	Dorso-ventral axis formation	35	-0.36	-1.44	0.037	0.099
	depleted in 1st	API04013	MAPK signaling pathway	84	-0.28	-1.31	0.015	0.178
	depleted in 1st	API04150	mTOR signaling pathway	85	-0.27	-1.31	0.048	0.174
	Enriched in 1st vs 4th
	enriched in 1st	API04080	Neuroactive ligand-receptor interaction	41	0.59	1.93	0	0.001
	enriched in 1st	API04512	ECM-receptor interaction	22	0.62	1.78	0.001	0.005
	enriched in 1st	API04624	Toll and Imd signaling pathway	49	0.43	1.46	0.033	0.066
	depleted in 1st	API04341	Hedgehog signaling pathway - fly	33	-0.55	-2.25	0	0
	depleted in 1st	API04310	Wnt signaling pathway	72	-0.3	-1.42	0.012	0.134
	Enriched in 1st vs YA
	enriched in 1st	API04080	Neuroactive ligand-receptor interaction	41	0.5	1.53	0.014	0.038
	enriched in 1st	API04512	ECM-receptor interaction	22	0.53	1.45	0.05	0.07
	enriched in 1st	API04624	Toll and Imd signaling pathway	49	0.46	1.45	0.031	0.07
	depleted in 1st	API04341	Hedgehog signaling pathway - fly	33	-0.6	-2.22	0	0.001
	depleted in 1st	API04310	Wnt signaling pathway	72	-0.48	-2.03	0	0.005
	depleted in 1st	API04392	Hippo signaling pathway - multiple species	17	-0.51	-1.63	0.028	0.112
	depleted in 1st	API04350	TGF-beta signaling pathway	47	-0.38	-1.48	0.022	0.203
	depleted in 1st	API04330	Notch signaling pathway	33	-0.39	-1.43	0.026	0.25
	Enriched in 2nd vs 4th
	enriched in 2nd	API04512	ECM-receptor interaction	22	0.59	1.71	0.003	0.013
	enriched in 2nd	API04745	Phototransduction	21	0.54	1.55	0.016	0.049
	enriched in 2nd	API04320	Dorso-ventral axis formation	35	0.47	1.52	0.025	0.059
	enriched in 2nd	API04624	Toll and Imd signaling pathway	49	0.42	1.44	0.036	0.092
	Enriched in 2nd vs YA
	enriched in 2nd	API04320	Dorso-ventral axis formation	35	0.47	1.51	0.035	0.057
	depleted in 2nd	API04080	Neuroactive ligand-receptor interaction	41	-0.45	-1.57	0.012	0.219
	Enriched in 3rd vs YA
	enriched in 3rd	API04320	Dorso-ventral axis formation	35	0.61	2.15	0	0
	enriched in 3rd	API04341	Hedgehog signaling pathway - fly	33	0.52	1.77	0.006	0.013
	enriched in 3rd	API04350	TGF-beta signaling pathway	47	0.45	1.7	0.003	0.024
	enriched in 3rd	API04013	MAPK signaling pathway	84	0.37	1.53	0.007	0.064
	enriched in 3rd	API04068	FoxO signaling pathway	58	0.38	1.49	0.016	0.08
	enriched in 3rd	API04391	Hippo signaling pathway	56	0.38	1.48	0.018	0.081
	depleted in 3rd	API04080	Neuroactive ligand-receptor interaction	41	-0.59	-1.92	0	0.01
	1FDR q-value £ 0.25 & p-value £ 0.05. 2Number of genes included in the gene set. 3Enrichment Score. 4Normalized Enrichment Score. 5Normalized p -value. 6False Discovery Rate q -value.

## Sheet: Glycan
A. Life Stage Specific Comparisons			Glycan metabolism
	Direction of enrichment1	KEGG ID	KEGG PWY	SIZE2	ES3	NES4	p-val5	FDR q-val6
	1st vs average of other stages
	enriched	API00513	Various types of N-glycan biosynthesis	44	0.498292	1.77143	0	0.00728172
	enriched	API00511	Other glycan degradation	20	0.559108	1.68142	0.00987306	0.013876
	enriched	API00604	Glycosphingolipid biosynthesis - ganglio series	30	0.501092	1.66597	0.00559441	0.0153569
	enriched	API00531	Glycosaminoglycan degradation	17	0.572642	1.64889	0.0162003	0.0173384
	enriched	API00564	Glycerophospholipid metabolism	53	0.416463	1.53513	0.0189394	0.0411845
	depleted	API00563	Glycosylphosphatidylinositol (GPI)-anchor biosynthesis	23	-0.569239	-2.06883	0	0.000987683
	2nd vs average of other stages
	enriched	API00604	Glycosphingolipid biosynthesis - ganglio series	30	0.500196	1.79006	0.002457	0.0109839
	depleted	API00563	Glycosylphosphatidylinositol (GPI)-anchor biosynthesis	23	-0.578829	-1.84849	0.00165289	0.0323192
	4th vs average of other stages
	enriched	API00563	Glycosylphosphatidylinositol (GPI)-anchor biosynthesis	23	0.630868	2.45674	0	0.000829268
	depleted	API00511	Other glycan degradation	20	-0.631883	-2.01253	0	0.00102867
	depleted	API00531	Glycosaminoglycan degradation	17	-0.535778	-1.61516	0.0180723	0.036182
	depleted	API00604	Glycosphingolipid biosynthesis - ganglio series	30	-0.447972	-1.57248	0.0245566	0.0450843
	depleted	API00564	Glycerophospholipid metabolism	53	-0.372221	-1.47285	0.0363392	0.0825919
	YA vs average of other stages
	depleted	API00513	Various types of N-glycan biosynthesis	44	-0.405227	-1.48168	0.0249169	0.0629228
	1FDR q-value £ 0.25 & p-value £ 0.05. 2Number of genes included in the gene set. 3Enrichment Score. 4Normalized Enrichment Score. 5Normalized p -value. 6False Discovery Rate q -value.
B. Sequential Life Stage Comparisons			Glycan metabolism
	Direction of enrichment1	KEGG ID	KEGG PWY	SIZE2	ES3	NES4	p-val5	FDR q-val6
	Enriched in 1st vs 2nd
	enriched in 1st	API00531	Glycosaminoglycan degradation	17	0.62599	1.64652	0.0101597	0.0532792
	enriched in 1st	API00513	Various types of N-glycan biosynthesis	44	0.513575	1.58822	0.00976801	0.0638014
	Enriched in 2nd vs 3rd
	enriched in 2nd	API00604	Glycosphingolipid biosynthesis - ganglio series	30	0.518225	1.51888	0.0244216	0.050541
	enriched in 2nd	API00564	Glycerophospholipid metabolism	53	0.412301	1.37076	0.047561	0.128592
	depleted in 2nd	API00563	Glycosylphosphatidylinositol (GPI)-anchor biosynthesis	23	-0.466423	-1.5841	0.0118577	0.0588799
	Enriched in 3rd vs 4th
	enriched in 3rd	API00511	Other glycan degradation	20	0.593349	1.65324	0.0046875	0.0330276
	depleted in 3rd	API00563	Glycosylphosphatidylinositol (GPI)-anchor biosynthesis	23	-0.551397	-1.77567	0.00557103	0.0484521
	Enriched in 4th vs YA
	enriched in 4th	API00563	Glycosylphosphatidylinositol (GPI)-anchor biosynthesis	23	0.548422	1.97164	0.00387597	0.00468929
	1FDR q-value £ 0.25 & p-value £ 0.05. 2Number of genes included in the gene set. 3Enrichment Score. 4Normalized Enrichment Score. 5Normalized p -value. 6False Discovery Rate q -value.
C. Intermediate Life Stage Comparisons			Glycan metabolism
	Direction of enrichment1	KEGG ID	KEGG PWY	SIZE2	ES3	NES4	p-val5	FDR q-val6
	Enriched in 1st vs 3rd
	enriched in 1st	API00513	Various types of N-glycan biosynthesis	44	0.49	1.57	0.006	0.037
	enriched in 1st	API00604	Glycosphingolipid biosynthesis - ganglio series	30	0.52	1.55	0.019	0.04
	depleted in 1st	API00563	Glycosylphosphatidylinositol (GPI)-anchor biosynthesis	23	-0.45	-1.66	0.018	0.03
	Enriched in 1st vs 4th
	enriched in 1st	API00604	Glycosphingolipid biosynthesis - ganglio series	30	0.53	1.65	0.002	0.017
	enriched in 1st	API00511	Other glycan degradation	20	0.59	1.63	0.019	0.018
	enriched in 1st	API00531	Glycosaminoglycan degradation	17	0.59	1.57	0.023	0.028
	enriched in 1st	API00513	Various types of N-glycan biosynthesis	44	0.46	1.52	0.014	0.042
	depleted in 1st	API00563	Glycosylphosphatidylinositol (GPI)-anchor biosynthesis	23	-0.63	-2.29	0	0
	Enriched in 1st vs YA
	enriched in 1st	API00513	Various types of N-glycan biosynthesis	44	0.56	1.75	0.002	0.005
	enriched in 1st	API00604	Glycosphingolipid biosynthesis - ganglio series	30	0.56	1.62	0.009	0.017
	enriched in 1st	API00511	Other glycan degradation	20	0.6	1.6	0.015	0.022
	enriched in 1st	API00531	Glycosaminoglycan degradation	17	0.61	1.59	0.014	0.023
	enriched in 1st	API00564	Glycerophospholipid metabolism	53	0.47	1.51	0.018	0.045
	depleted in 1st	API00563	Glycosylphosphatidylinositol (GPI)-anchor biosynthesis	23	-0.45	-1.52	0.027	0.217
	Enriched in 2nd vs 4th
	enriched in 2nd	API00511	Other glycan degradation	20	0.52	1.48	0.044	0.075
	enriched in 2nd	API00604	Glycosphingolipid biosynthesis - ganglio series	30	0.48	1.48	0.035	0.073
	depleted in 2nd	API00563	Glycosylphosphatidylinositol (GPI)-anchor biosynthesis	23	-0.62	-2.09	0	0.006
	depleted in 2nd	API00515	Mannose type O-glycan biosynthesis	4	-0.8	-1.58	0.048	0.125
	Enriched in 2nd vs YA
	enriched in 2nd	API00511	Other glycan degradation	20	0.57	1.6	0.01	0.033
	enriched in 2nd	API00604	Glycosphingolipid biosynthesis - ganglio series	30	0.51	1.58	0.019	0.036
	depleted in 2nd	API00563	Glycosylphosphatidylinositol (GPI)-anchor biosynthesis	23	-0.52	-1.62	0.026	0.292
	Enriched in 3rd vs YA
	enriched in 3rd	API00603	Glycosphingolipid biosynthesis - globo and isoglobo series	12	0.64	1.71	0.02	0.023
	enriched in 3rd	API00511	Other glycan degradation	20	0.52	1.58	0.019	0.048
	1FDR q-value £ 0.25 & p-value £ 0.05. 2Number of genes included in the gene set. 3Enrichment Score. 4Normalized Enrichment Score. 5Normalized p -value. 6False Discovery Rate q -value.

## Sheet: Other
A. Life Stage Specific Comparisons			Other
	Direction of enrichment1	KEGG ID	KEGG PWY	SIZE2	ES3	NES4	p-val5	FDR q-val6
	1st vs average of other stages
	enriched	API00130	Ubiquinone and other terpenoid-quinone biosynthesis	7	0.678485	1.48741	0.053068	0.0552598
	3rd vs average of other stages
	depleted	API00900	Terpenoid backbone biosynthesis	35	-0.509669	-1.79192	0.00291121	0.0116396
	4th vs average of other stages
	depleted	API04213	Longevity regulating pathway - multiple species	42	-0.47024	-1.76361	0.00131926	0.0118571
	depleted	API04711	Circadian rhythm - fly	9	-0.651163	-1.65386	0.0241158	0.0270118
	1FDR q-value £ 0.25 & p-value £ 0.05. 2Number of genes included in the gene set. 3Enrichment Score. 4Normalized Enrichment Score. 5Normalized p -value. 6False Discovery Rate q -value.
B. Sequential Life Stage Comparisons			Other
	Direction of enrichment1	KEGG ID	KEGG PWY	SIZE2	ES3	NES4	p-val5	FDR q-val6
	Enriched in 2nd vs 3rd
	enriched in 2nd	API00900	Terpenoid backbone biosynthesis	35	0.51438	1.56337	0.0128205	0.0413689
	Enriched in 3rd vs 4th
	enriched in 3rd	API04213	Longevity regulating pathway - multiple species	42	0.613343	2.00734	0	0
	enriched in 3rd	API04711	Circadian rhythm - fly	9	0.661086	1.51373	0.0520134	0.0961631
	1FDR q-value £ 0.25 & p-value £ 0.05. 2Number of genes included in the gene set. 3Enrichment Score. 4Normalized Enrichment Score. 5Normalized p -value. 6False Discovery Rate q -value.
C. Intermediate Life Stage Comparisons			Other
	Direction of enrichment1	KEGG ID	KEGG PWY	SIZE2	ES3	NES4	p-val5	FDR q-val6
	Enriched in 2nd vs 4th
	enriched in 2nd	API04213	Longevity regulating pathway - multiple species	42	0.53	1.73	0.001	0.011
	1FDR q-value £ 0.25 & p-value £ 0.05. 2Number of genes included in the gene set. 3Enrichment Score. 4Normalized Enrichment Score. 5Normalized p -value. 6False Discovery Rate q -value.
